1 **Peroxiredoxin promotes longevity and H<sub>2</sub>O<sub>2</sub>-resistance in yeast through redox-**  
2 **modulation of protein kinase A**

3

4

5 Friederike Roger<sup>1</sup>, Cecilia Picazo<sup>1,2</sup>, Chikako Asami<sup>1</sup>, Wolfgang Reiter<sup>3</sup>, Sarah Hanzén<sup>1</sup>, Chunxia  
6 Gao<sup>1</sup>, Gilles Lagniel<sup>4</sup>, Niek Welkenhuysen<sup>5</sup>, Jean Labarre<sup>4</sup>, Thomas Nyström<sup>6</sup>, Morten Grøtli<sup>1</sup>, Markus  
7 Hartl<sup>3</sup> and Mikael Molin\*<sup>1,2</sup>

8

9 <sup>1</sup>Department of Chemistry and Molecular Biology, University of Gothenburg, SWEDEN

10 <sup>2</sup>Department of Biology and Biological Engineering, Chalmers University of Technology,  
11 Gothenburg, SWEDEN

12 <sup>3</sup>Mass Spectrometry Facility, Department of Biochemistry, Max F. Perutz Laboratories, University of  
13 Vienna, Vienna BioCenter, Vienna, AUSTRIA

14 <sup>4</sup>Oxidative Stress and Cancer Laboratory, Integrative Biology and Molecular Genetics Unit  
15 (SBIGEM), CEA Saclay, FRANCE

16 <sup>5</sup>Department of Mathematical Sciences, Chalmers University of Technology and University of  
17 Gothenburg, SWEDEN

18 <sup>6</sup>Department of Microbiology and Immunology, Institute for Biomedicine, Sahlgrenska Academy,  
19 University of Gothenburg

20

21 \*Correspondence: [mikael.molin@chalmers.se](mailto:mikael.molin@chalmers.se)

22

23

24

25

26

27

28

29

30

31 **Keywords**

32 Aging, peroxiredoxin, H<sub>2</sub>O<sub>2</sub> signaling, protein kinase A, glutathionylation, hormesis

1 **Abstract**

2 Peroxiredoxins are major peroxide scavenging enzymes and mediators of the beneficial effects of  
3 caloric restriction on aging. By which mechanism peroxiredoxins stimulate H<sub>2</sub>O<sub>2</sub> resistance and slow  
4 down aging is, however, incompletely understood. Here we show that the yeast peroxiredoxin Tsa1  
5 boosts H<sub>2</sub>O<sub>2</sub> tolerance and delays aging not by its action of scavenging H<sub>2</sub>O<sub>2</sub>, but by repressing the  
6 nutrient signaling protein kinase A (PKA). Tsa1 represses PKA activity through redox modification of  
7 the catalytic subunits and a significant proportion of catalytic subunits are glutathionylated on two  
8 cysteine residues. Redox modification of the conserved Cys243 in the catalytic subunits inhibits the  
9 phosphorylation of a conserved Thr241 in the kinase activation loop and enzyme activity and  
10 preventing Thr241 phosphorylation can overcome the H<sub>2</sub>O<sub>2</sub> sensitivity of Tsa1-deficient cells. Results  
11 support a model of aging where nutrient signaling pathways constitute hubs integrating information  
12 from multiple aging-related conduits including a peroxiredoxin-dependent responding to H<sub>2</sub>O<sub>2</sub>.

13

## 1 **Introduction**

2 Caloric restriction (CR) is an intervention that slows down aging and reduces the incidence of age-  
3 related disease in most organisms, from the unicellular baker's yeast (Lin, Defossez, & Guarente,  
4 2000) to rhesus monkeys (Mattison et al., 2017).

5 CR-induced reduced nutrient signaling via insulin/insulin-like growth factor (IGF-1), the target-of-  
6 rapamycin and/or protein kinase A pathways is intimately linked to lifespan extension (L. Fontana,  
7 Partridge, L., and Longo, V.D., 2010; Kenyon, 2010; Molin & Demir, 2014; Nystrom, Yang, & Molin,  
8 2012). Of other things, reduced nutrient signaling mitigates age-related oxidative damage by  
9 increasing oxidative stress resistance in organisms from yeast to humans (Fontan-Lozano, Lopez-  
10 Lluch, Delgado-Garcia, Navas, & Carrion, 2008; Heilbronn et al., 2006; Molin et al., 2011; Schulz et  
11 al., 2007; Sohal & Forster, 2014), and this effect appears as a common denominator of the nutrient  
12 signaling pathways that dictate the anti-aging effects of CR and its health benefits (Alic & Partridge,  
13 2011; L. Fontana, Partridge, & Longo, 2010; Longo, Shadel, Kaeberlein, & Kennedy, 2012). Still very  
14 few specific targets of nutrient signaling explaining the beneficial effects of CR have been identified  
15 (L. Fontana et al., 2010).

16 In this respect it is interesting that the peroxiredoxins, which constitute a major family of peroxide-  
17 negotiating anti-oxidant enzymes, are required for lifespan promotion by CR and CR-mimetics (De  
18 Haes et al., 2014; Molin et al., 2011; Olahova & Veal, 2015). For instance, in worms, the CR-mimetic  
19 drug metformin extends lifespan in a manner dependent on the activity of Prdx-2 (De Haes et al.,  
20 2014), and in flies, neuronal peroxiredoxin overexpression extends lifespan in the absence of caloric  
21 restriction (Lee et al., 2009). We previously showed in yeast that CR increases both H<sub>2</sub>O<sub>2</sub> tolerance  
22 and lifespan by stimulating the activity of the major 2-Cys peroxiredoxin, Tsa1 (Molin et al., 2011). In  
23 addition, mild overexpression of Tsa1 potently extended lifespan (40%) (Hanzen et al., 2016), which  
24 led us to ask by which mechanism peroxiredoxins reduce the rate of aging? As major cellular peroxide  
25 scavenging enzymes, peroxiredoxins are required for the maintenance of genome stability (Molin &  
26 Demir, 2014; Nystrom et al., 2012) and PrxI-deficient mice prematurely accumulate age-related  
27 tumors (Neumann et al., 2003). However, mild Tsa1 overexpression, although increasing lifespan, did  
28 not alter the rate at which mutations accumulate during aging (Hanzen et al., 2016). Furthermore, CR  
29 reduces the increased mutation rate in Tsa1-deficient cells by 50% (Hanzen et al., 2016) without  
30 extending their life-span (Molin et al., 2011). We instead proposed that Tsa1 acquires the ability to  
31 counteracts age-related protein damage by guiding Hsp70/104 molecular chaperones to proteins  
32 aggregating upon increased age and H<sub>2</sub>O<sub>2</sub> (Hanzen et al., 2016).

33 Prx are obligate dimers carrying two cysteines, one of which reduces H<sub>2</sub>O<sub>2</sub>, thereby forming a sulfenic  
34 acid (C48-SOH in yeast Tsa1), which condenses with the other cysteine of the second Prx molecule  
35 (Cys171) into an inter-subunit disulfide, reduced by thioredoxin. Once the Cys48-SOH is formed it  
36 can react with another molecule of H<sub>2</sub>O<sub>2</sub> to form a sulfenic acid (Cys48-SOOH), instead of condensing  
37 into a disulfide. Sulfenylation inactivates the enzyme catalytic cycle, switching it into a molecular  
38 chaperone by multimerisation (Hanzen et al., 2016; Jang et al., 2004; Noichri et al., 2015). In addition  
39 to their scavenging and chaperone functions, Prxs have also been shown to signal hydrogen peroxide  
40 by transfer of the oxidant signal to target proteins (Leichert & Dick, 2015; Stocker, Van Laer,  
41 Mijuskovic, & Dick, 2017). We recently showed that, in response to H<sub>2</sub>O<sub>2</sub>, Tsa1 and thioredoxin were  
42 required to inhibit PKA-mediated repression of the transcription factor Msn2 leading to its activation  
43 (Bodvard et al., 2017), and in worms, increased Prdx-2 function upon metformin treatment was  
44 connected to increased PMK-1/p38 mitogen-activated protein kinase (MAPK) activity (De Haes et al.,  
45 2014).

1 Here we explored whether the H<sub>2</sub>O<sub>2</sub> signaling function of Tsa1 had any relevance in its role in H<sub>2</sub>O<sub>2</sub>  
2 resistance and in slowing down aging. We show that the hydrogen peroxide sensitivity and premature  
3 aging in cells lacking Tsa1 is due to aberrant nutrient signaling through protein kinase A (PKA), and  
4 not to defective H<sub>2</sub>O<sub>2</sub> scavenging per se. Tsa1 interacts with PKA at the level of its catalytic subunits.  
5 We identified a conserved cysteine in the most highly expressed PKA catalytic subunit that is  
6 specifically required for Tsa1-mediated H<sub>2</sub>O<sub>2</sub> resistance. Tsa1-dependent redox-modification of this  
7 Cys residue reduced enzyme activity and increased H<sub>2</sub>O<sub>2</sub> resistance in part through dephosphorylating  
8 a conserved threonine (Thr241) in the kinase activation loop. These results indicate that  
9 peroxiredoxins slow down the rate of aging through a unique role in kinase signaling and suggest a  
10 novel mode of regulation of the conserved nutrient-sensing cascade PKA bypassing conventional  
11 signaling via the second messenger cAMP and impinging on H<sub>2</sub>O<sub>2</sub> resistance and aging.

12

## 1 **Results**

### 2 **Tsa1 slows down aging in a manner dependent on both catalytic cysteines but independent on** 3 **H<sub>2</sub>O<sub>2</sub> scavenging**

4 To clarify the mechanism by which Tsa1 promotes longevity, we analyzed the lifespans of *tsa1C48S*  
 5 (*Cys48Ser*) and *tsa1C171S* (*Cys171Ser*) mutants (Fig. 1A). In agreement with a crucial role of the  
 6 catalytic cysteines in lifespan control *tsa1C48S* and *tsa1C171S* cells suffered a lifespan as short as  
 7 cells lacking Tsa1 altogether (Fig. 1A). In addition, cells expressing a truncated form of Tsa1 lacking  
 8 the C-terminal YF motif (*tsa1ΔYF*), which is not sensitive to sulfinylation (Hanzen et al., 2016), had a  
 9 near wild-type lifespan, supporting the idea that both Tsa1 catalytic cysteines and only to a minor  
 10 extent Tsa1C48 sulfinylation are important for peroxiredoxin-mediated control of the rate of aging.  
 11 We next inquired whether the H<sub>2</sub>O<sub>2</sub>-sensitivity and short lifespan of cells lacking Tsa1 was caused by  
 12 defective H<sub>2</sub>O<sub>2</sub>-scavenging. In a first assay, we exposed cells to H<sub>2</sub>O<sub>2</sub> and monitored its decay in the  
 13 extracellular milieu. Like cells expressing an extra copy of *TSA1* (Hanzen et al., 2016), Tsa1-deficient  
 14 cells reduced exogenous H<sub>2</sub>O<sub>2</sub> as efficiently as did wild-type cells (Fig. 1B). To measure H<sub>2</sub>O<sub>2</sub> levels

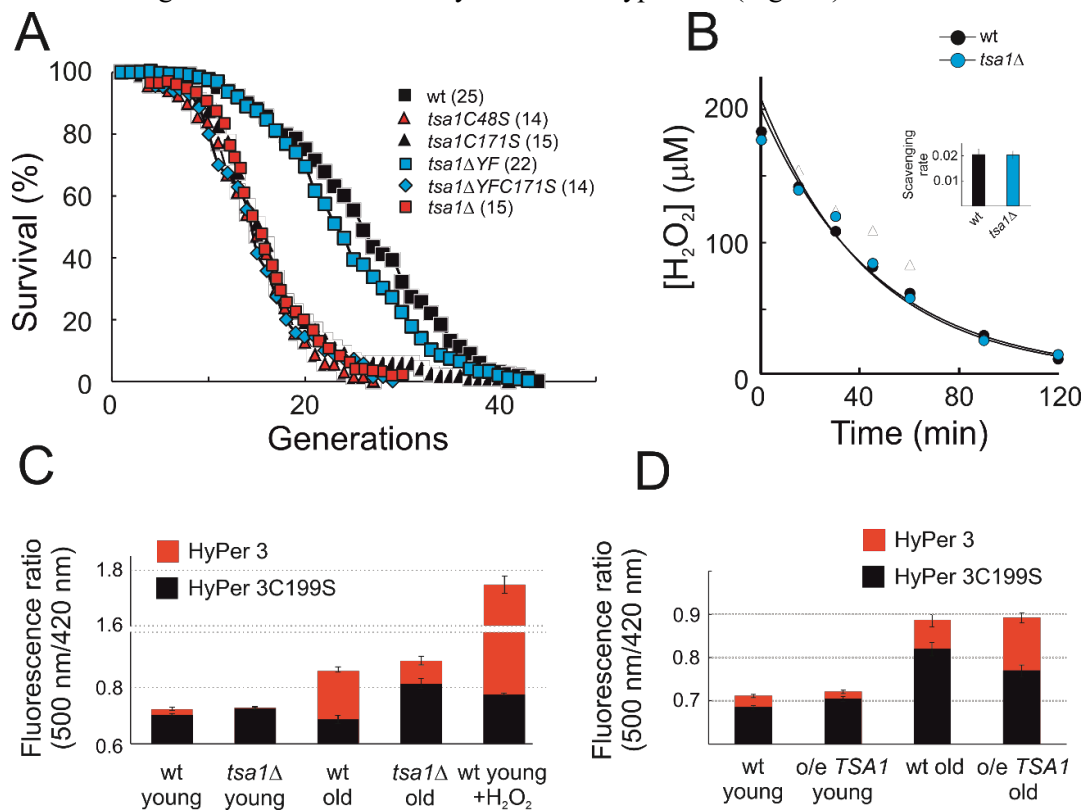

15 **Figure 1.** The peroxiredoxin Tsa1 slows down aging in a manner dependent on catalytic cycling but  
 16 independent on H<sub>2</sub>O<sub>2</sub>-scavenging. **A)** Life spans of wild-type or the indicated genomic *TSA1* mutant  
 17 strains (n=120-293). **B)** H<sub>2</sub>O<sub>2</sub> scavenging measured as the removal of medium H<sub>2</sub>O<sub>2</sub>. A representative  
 18 curve for cultures to which 200 μM was added is shown. Inset shows average scavenging rates for  
 19 cultures to which 400 μM was added (n=3). Error bars indicate SD. **C)** Average HyPer3 (red) or  
 20 HyPer3 C199S (black) fluorescence ratio (500 nm/420 nm) in young or old wild-type or *tsa1Δ* cells in  
 21 the absence of H<sub>2</sub>O<sub>2</sub> or following the addition of 400 μM H<sub>2</sub>O<sub>2</sub> for 10 min. Cells of about 10-12  
 22 generations of replicative age (old) or young control cells (young) were isolated by the biotin-  
 23 streptavidin method. Error bars indicate standard error of the mean (n=170-619). **D)** Average HyPer3  
 24 (red) or HyPer3 C199S (black) fluorescence ratio (500 nm/420 nm) in young or old wild-type  
 25 (YMM130) and o/e *TSA1* cells isolated as in **C)**. Error bars indicate standard error of the mean  
 26 (n=381-579).

1 in cells lacking Tsa1 specifically in the context of aging we expressed the genetically encoded H<sub>2</sub>O<sub>2</sub>  
 2 sensor HyPer3 (Bilan et al., 2013) in aged cells. In wild-type cells of about 10 generations of age we  
 3 observed a modest but significant increase in the H<sub>2</sub>O<sub>2</sub> specific HyPer signal compared to young  
 4 control cells. Tsa1-deficient cells suffered a similar or lower increase in the H<sub>2</sub>O<sub>2</sub>-specific fluorescence  
 5 ratio, relative to the wild-type. In cells expressing an extra copy of the *TSA1* gene, which exhibit an  
 6 about 40% extended lifespan compared to control cells (Hanzen et al., 2016), the H<sub>2</sub>O<sub>2</sub>-specific  
 7 HyPer3 signal increased to a similar or increased extent in aged cells (Fig. 1D). We conclude that Tsa1  
 8 is required in aging control as a fully catalytically-active enzyme, although this requirement is not  
 9 linked to the cellular H<sub>2</sub>O<sub>2</sub> scavenging capacity.

## 10 Increased H<sub>2</sub>O<sub>2</sub> sensitivity and premature aging in cells lacking Tsa1 are both counteracted by 11 Ras deficiency

12 PKA antagonizes both longevity (Lin et al., 2000) and resistance to H<sub>2</sub>O<sub>2</sub> (Molin et al., 2011).  
 13 Furthermore, Tsa1 is required for the PKA-dependent phosphorylation of the transcription factor  
 14 Msn2 in response to H<sub>2</sub>O<sub>2</sub> (Bodvard et al., 2017). We thus evaluated whether PKA activity contributes  
 15 to the short lifespan and H<sub>2</sub>O<sub>2</sub>-sensitivity of Tsa1-deficient cells. We combined the deletion of *RAS2*,  
 16 which largely abrogates glucose stimulation of PKA and keeps PKA-activity at a low level still  
 17 compatible with growth [Fig. 2A, (Santangelo, 2006)], and of *TSA1*. Interestingly, Ras2 deficiency  
 18 completely counteracted the reduced lifespan (Fig. 2B) and H<sub>2</sub>O<sub>2</sub>-sensitivity (Fig. 2C-D, Fig. S1A) of  
 19 cells lacking Tsa1, suggesting that these phenotypes of cells lacking Tsa1 were caused by aberrantly  
 20 increased PKA activity. Ras2 deficiency was also able to partly overcome the H<sub>2</sub>O<sub>2</sub> sensitivity of cells  
 21 lacking both cytosolic thioredoxins (Fig. S1B), which recycle oxidized Prxs during catalytic cycling.  
 22 As Ras2 might control aging by a PKA-independent pathway

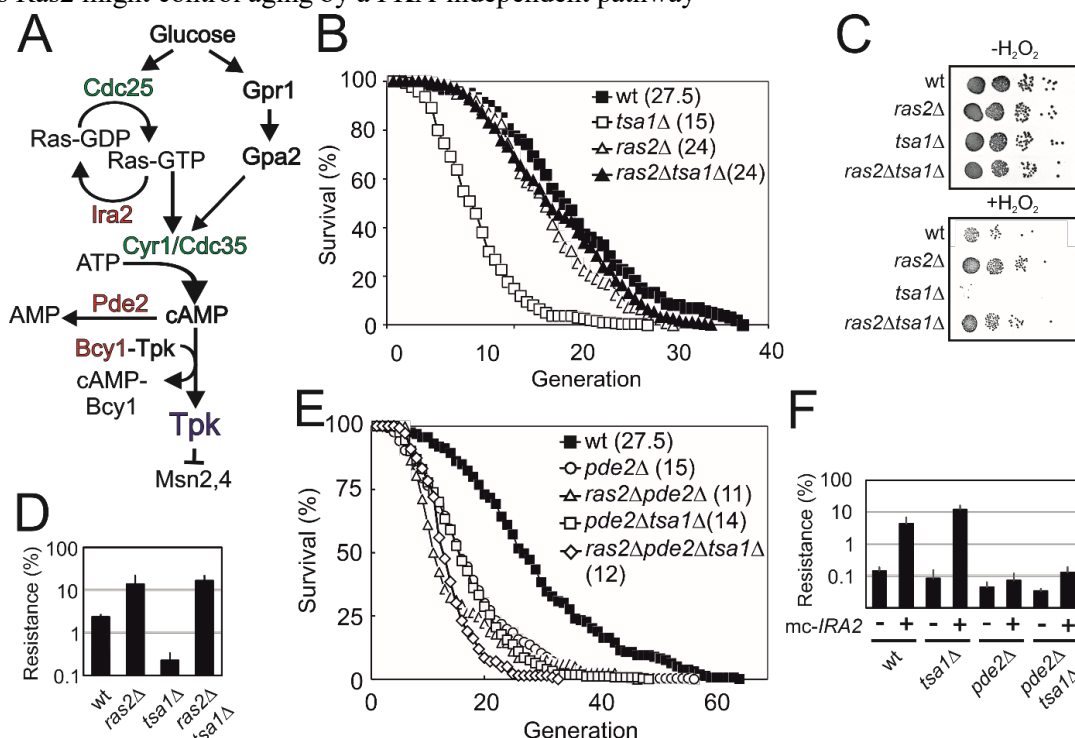

23 **Figure 2.** The accelerated aging and H<sub>2</sub>O<sub>2</sub> sensitivity of cells lacking Tsa1 can be counteracted by  
 24 reducing protein kinase A activity. **A.** Overview of the Ras-cAMP-PKA signaling pathway. In green  
 25 stimulatory components and in red inhibitory. **B, F** Lifespan of cells lacking Tsa1, Ras2, Pde2 or  
 26 combinations thereof (n=120-293). **C-D** H<sub>2</sub>O<sub>2</sub> resistance of cells lacking Tsa1, Ras2 or both at the  
 27 indicated culture density. **E-F** Quantification of H<sub>2</sub>O<sub>2</sub>-resistance (n=3). **F** H<sub>2</sub>O<sub>2</sub> resistance of the  
 28 indicated mutant cells overexpressing *IRA2* (mc-*IRA2* +) or the vector control (-), (n=3).

1 (Sun, Kale, Childress, Pinswasdi, & Jazwinski, 1994), we tested whether the suppression of the short  
 2 lifespan and H<sub>2</sub>O<sub>2</sub>-sensitivity in Tsa1-deficient cells conferred by Ras2-deficiency was linked to  
 3 reduced PKA activity. To this end we deleted the high affinity cAMP-phosphodiesterase *PDE2* in  
 4 cells lacking Ras2 and Tsa1 to independently increase PKA activity. *PDE2* deletion restored both the  
 5 H<sub>2</sub>O<sub>2</sub>-sensitivity (Fig. S1C) and the accelerated aging of Tsa1-deficient cells (Fig. 2E). Furthermore,  
 6 Pde2 deficiency and Tsa1-deficiency appeared to impinge on the same pathway of aging-control since  
 7 cells lacking either of these two proteins were as short-lived (Fig. 2E) and H<sub>2</sub>O<sub>2</sub>-sensitive (Fig. S1C)  
 8 as cells lacking both. Similar to *RAS2* deletion, overproduction of the Ras-GTPase activating protein  
 9 (GAP) Ira2, which reduces the levels of active Ras (Ras-GTP, Fig. 2A) was also able to overcome  
 10 H<sub>2</sub>O<sub>2</sub> sensitivity of cells lacking Tsa1 (Fig. 2F) in a manner dependent on decreased PKA activity,  
 11 since *pde2Δtsa1Δ* cells overproducing Ira2 were sensitive to H<sub>2</sub>O<sub>2</sub> (Fig. 2F). We conclude that H<sub>2</sub>O<sub>2</sub>-  
 12 sensitivity and the short lifespan of cells lacking Tsa1 is linked to aberrantly increased PKA activity.

### 13 The slow growth of Ras-deficient cells is caused by inhibition of PKA by Tsa1

14 Cells lacking Ras2 grew significantly slower than the wild-type (Fig. 3A, Fig. S1C), consistent with a  
 15 substantial reduction in PKA activity. In contrast, cells lacking both Ras2 and Tsa1 grew at a rate

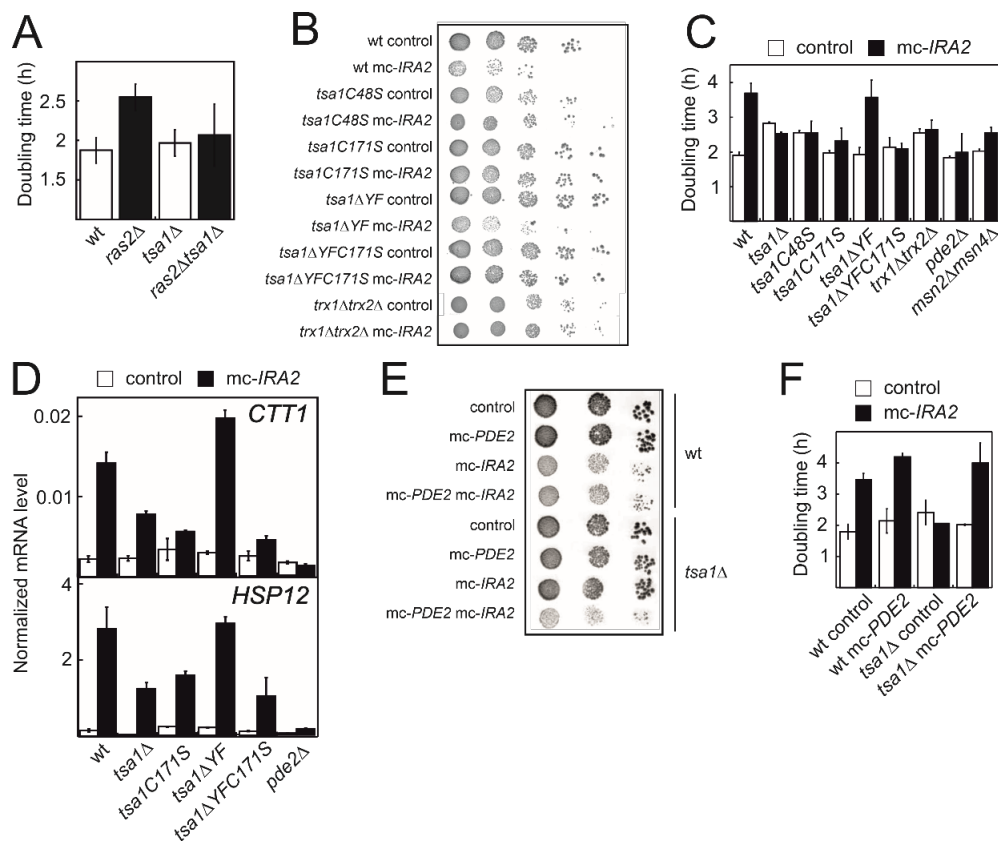

16 **Figure 3.** The slow growth of Ras-deficient cells can be restored by mutations preventing Tsa1  
 17 catalytic cycling and its inhibitory effect on PKA signaling. **A)** Growth rates of cells lacking Ras2, Tsa1  
 18 or both (n=3, error bars indicate SD). **B-C)** Growth rates of cells overexpressing *IRA2* in the indicated  
 19 mutants of the Tsa1 catalytic cycle or the PKA signaling pathway on solid (**B**) or in liquid medium (**C**,  
 20 n=3-7). **D)** Expression of the PKA repressed *CTT1* or *HSP12* genes in the indicated mutants in the  
 21 Tsa1 catalytic cycle overexpressing *IRA2* (mc-*IRA2*) or not (instead expressing the vector, control,  
 22 n=3±SD) sampled during mid-exponential growth. **E-F)** Growth of Tsa1-proficient or deficient (*tsa1Δ*)  
 23 cells overexpressing *IRA2* (mc-*IRA2*) or *PDE2* (mc-*PDE2*), both or the corresponding vector control  
 24 plasmids (control) on solid medium (**E**) or in liquid medium (**F**, n=3±SD).

1 indistinguishable from that of Tsa1-deficient cells (Fig. 3A), which suggests both that Tsa1 inhibits  
 2 PKA activity, and that this occurs in a manner independent of Ras2. To further substantiate this result,  
 3 we checked the effect of Tsa1 deficiency in cells in which Ras and PKA were inactivated as a result of  
 4 Ira2 overexpression. The latter condition slowed down growth to approximately half the rate of control  
 5 cells, but strikingly deleting *TSA1* restored growth to wild type levels (Fig. 3B-C, Fig. S2A-B). As an  
 6 indication that this rescue involves increased PKA activity, expression of the PKA-repressed Msn2/4  
 7 target genes decreased in such cells (Fig. 3D, Fig. S2C). Furthermore, overproducing both Pde2 and  
 8 Ira2 in cells lacking Tsa1 slowed down growth to the rates of wild-type cells overproducing Ira2, also  
 9 indicating that the rescue of the slow growth of Ras2-deficient cells by deletion of Tsa1 is due to  
 10 increased PKA activity (Fig. 3E-F). The above results thus indicate that Tsa1 inhibits PKA. We next  
 11 enquired whether this effect required Tsa1 catalytic Cys residues by overproducing Ira2 in Tsa1-  
 12 catalytic cysteines C48 and C171 mutants or in cells expressing Tsa1YF (*tsa1ΔYF*). Strikingly, as its  
 13 null deletion, *tsa1C171S* substitution suppressed the slow growth of Ira2 overproducing cells (Fig. 3B-  
 14 C) and reduced the expression of the PKA-repressed genes *CTT1* and *HSP12* (Fig. 3D), in contrast to  
 15 *tsa1ΔYF*, that had no effect on any of these parameters (Fig. 3B-D). Tsa1-mediated H<sub>2</sub>O<sub>2</sub>-signaling to  
 16 PKA requires thioredoxin (Bodvard et al., 2017) and in analogy with this, slow growth (Fig. 3B-C)  
 17 and the increased expression of Msn2/4 targets (Fig. S2C) upon Ras-deficiency were absolutely  
 18 dependent on the presence of cytosolic thioredoxins (Trx1 and Trx2). Taken together, the data suggest  
 19 that in Ras-deficient cells catalytically active Tsa1 restrain PKA-dependent activity through a  
 20 mechanism involving the thioredoxins.

## 21 A single extra copy of *TSA1* slows down aging by mildly reducing PKA activity

22 We previously observed that a single extra-copy of the *TSA1* gene substantially extends lifespan in the  
 23 absence of caloric restriction (Hanzen et al., 2016). We thus asked whether this effect was due to  
 24 Tsa1-dependent PKA inhibition. Deleting *PDE2* indeed prevented the increased lifespan seen in the  
 25 wild type upon mild *TSA1* overexpression (Fig. 4A,  $6.7 \pm 1\%$ , longer lifespan in *pde2Δ o/e TSA1*  
 26 versus *pde2Δ* control cells, n=3). As further evidence that cells mildly overexpressing Tsa1 exhibit  
 27 decreased PKA activity, both the accumulation of the reserve carbohydrate glycogen (Fig. 4B) and the  
 28 expression of the PKA-repressed Msn2/4 target Hsp12 (Fig. 4C) increased. In addition, such cells  
 29 were resistant to H<sub>2</sub>O<sub>2</sub> (Fig. 4D). These effects were lost in cells also lacking Pde2, thus indicating that  
 30 they are indeed caused by a reduction in PKA activity (Fig. 4C-D).

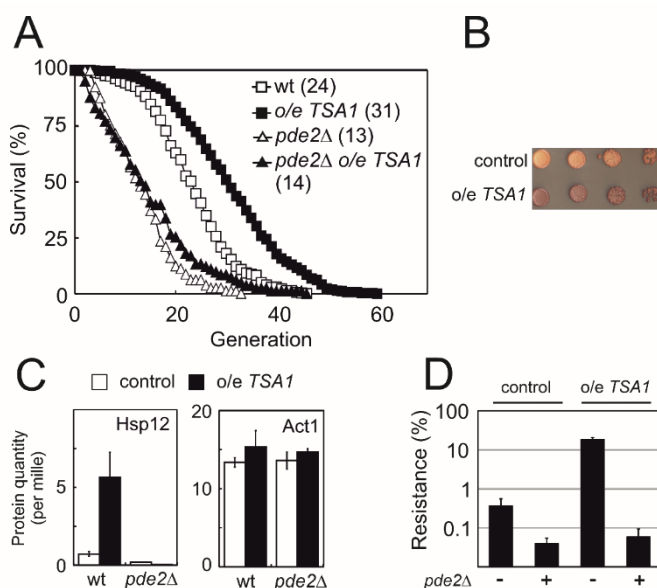

**Figure 4.** An extra copy of the *TSA1* gene represses PKA signaling, increases H<sub>2</sub>O<sub>2</sub> resistance and extends lifespan in a manner dependent on reduced PKA signaling. **A**) Lifespans of cells expressing an extra copy of the *TSA1* gene or not (vector control) in combination with the deletion of *PDE2* to induce high PKA signaling (*pde2Δ*, n=92-439). **B**) Accumulation of glycogen in vector control cells or cells expressing an extra copy of the *TSA1* gene as assayed by iodine vapor. **C**) Expression of Hsp12 in the indicated mutant strains (n=3). **D**) H<sub>2</sub>O<sub>2</sub> resistance in the indicated mutant strains (n=3).



## 1 Tsa1 affects PKA activity independent of active Ras and cAMP

2 To establish at which level in the pathway Tsa1 affects PKA activity, we measured the levels of the  
 3 pathway signaling intermediates in cells overproducing Ira2 in the presence and absence of Tsa1. As  
 4 expected, overexpression of *IRA2* dramatically reduced the levels of active Ras (Ras-GTP) and this  
 5 reduction was largely maintained in *pde2Δ* cells (Fig. 5A), in which PKA signaling is increased

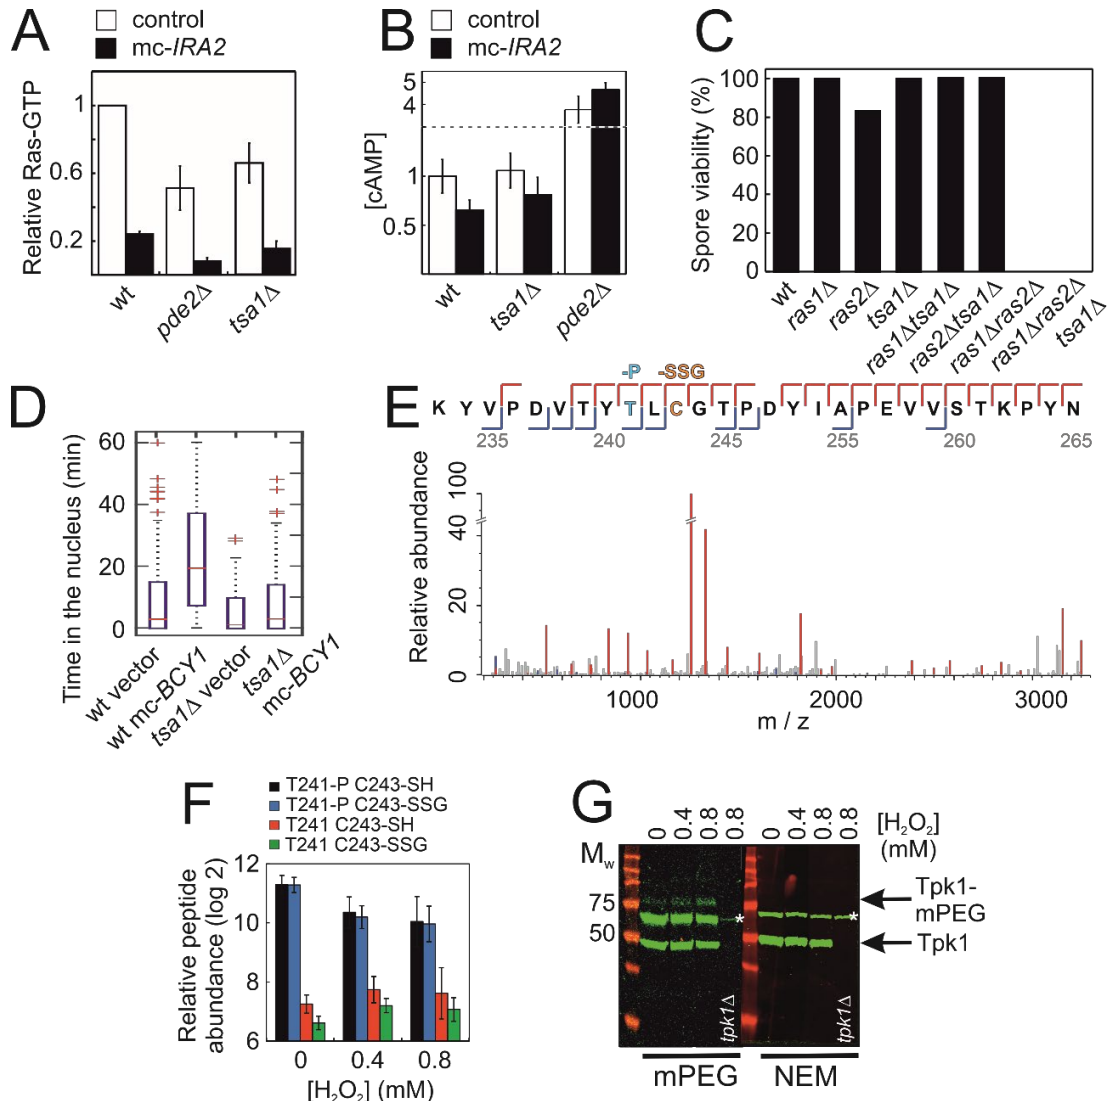

6 **Figure 5.** Tsa1 modulates PKA activity at the level of the catalytic subunit Tpk1 and Tpk1 is  
 7 glutathionylated at a conserved cysteine. **A-B**) Ras-GTP (**A**) or cAMP (**B**) levels in the wild-type or the  
 8 indicated mutant strains overexpressing *IRA2* (*mc-IRA2*) or not (expressing the vector control, control).  
 9 **C**) Spore viability of cells deficient in Ras1, Ras2, Tsa1 or combinations thereof. Viability was  
 10 estimated in 32 tetrads where genotypes could be assigned to all spores (128 in total, 8-23 spores per  
 11 genotype). **D**) Total time of nuclear Msn2 localization in the indicated mutant strains for 60 min  
 12 following the addition of 0.3 mM  $H_2O_2$ . **E**) MS-MS spectrum showing the matching b-ion (blue) and y-  
 13 ion (red) series following fragmentation of the Thr241 phosphorylated and C243 glutathionylated  
 14 peptide encompassing amino acid residues Y239-K261 in Tpk1. T-P = phospho-threonine, C-SSG =  
 15 glutathionylated cysteine. **F**) PRM-based quantification of the indicated Thr241 and Cys243 containing  
 16 Y239-K261 peptides in Tpk1, in the absence or presence of the indicated amount of  $H_2O_2$ ,  
 17 respectively (n=3). Error bars indicate SD. **G**) mPEG assay of the oxidation of Tpk1 following the  
 18 addition of the indicated amount of  $H_2O_2$  for 10 min. Cells were treated with  $H_2O_2$ , lysed by TCA and  
 19 reduced cysteines alkylated by NEM. Following reduction by DTT, oxidized cysteines were alkylated  
 20 by mPEG in half of the extract (mPEG) and to the other half NEM was added as a control (NEM).

1 downstream of Ras. Similarly, Tsa1-deficient cells overproducing Ira2 exhibited very low Ras-GTP  
2 levels (Fig. 5A). In addition, cAMP levels were barely affected in Tsa1-deficient cells (Fig. 5B). These  
3 data are thus consistent with a role of Tsa1 in modulating PKA activity downstream of cAMP.

4 The lethality of *ras1Δras2Δ* double mutants can be rescued by genetic interventions that restore PKA  
5 activity downstream of Ras, i.e. the inactivation of Pde2 or of the PKA negative regulatory subunit  
6 Bcy1 (Garrett & Broach, 1989; Toda et al., 1985; Wilson & Tatchell, 1988), or of Yak1, which is also  
7 downstream of PKA. Loss of Msn2 alone or of both Msn2 and its homologue Msn4, can also partially  
8 overcome the growth impairment of the partial loss of active Ras (Fig. 3C) and the requirement for a  
9 PKA catalytic subunit-encoding (*TPK*)-gene for viability (Smith, Ward, & Garrett, 1998). To test  
10 whether loss of Tsa1 could similarly compensate for the lack of Ras proteins we sporulated  
11 heterozygous *ras1Δ/RAS1*, *ras2Δ/RAS2* and *tsa1Δ/ TSA1* diploid cells. Among the wild-type and  
12 single mutant spores only the absence of *RAS2* conferred a moderately increased spore lethality (3 out  
13 of 18 spores or 17%, Fig. 5C) consistent with the significantly reduced PKA activity of such cells. The  
14 increased spore lethality in Ras2-deficient cells seemed to be in part mediated by Tsa1, since none of  
15 the 20 *ras2Δtsa1Δ* spores died, suggesting that Tsa1 also affected spore germination downstream of  
16 Ras. Importantly, however, lack of Tsa1 was unable to bypass the requirement for either Ras1 or Ras2  
17 in spore germination, since no cells lacking both Ras1 and Ras2 were viable irrespective of the  
18 presence or absence of Tsa1 (Fig. 5C). Along similar lines, lack of Tsa1 counteracted the moderately  
19 increased spore lethality of cells lacking the *TPK2* and/or *TPK3* genes encoding PKA catalytic  
20 subunits (Fig. S3A), but could not overcome the requirement of a single PKA catalytic subunit for  
21 spore germination (Toda, Cameron, Sass, Zoller, & Wigler, 1987). We indeed did not obtain viable  
22 *tsa1Δtpk1Δtpk2Δtpk3Δ* spores in a cross between haploid *tsa1Δ* and *tpk1Δtpk2Δtpk3Δ* strains  
23 unless a centromeric *TPK1* plasmid, used to keep the *tpk1Δtpk2Δtpk3Δ* strain alive, was also present  
24 (in 6 out of 6 viable spores with the genomic *tsa1Δtpk1Δtpk2Δtpk3Δ* genotype, Fig. S3A).

25 In addition, we noted that overproduction of the PKA negative regulatory subunit (*mc-BCY1*) could  
26 not overcome the PKA signaling defect in Tsa1-deficient cells, although dramatically increasing the  
27 Msn2 response to H<sub>2</sub>O<sub>2</sub> in Tsa1-proficient cells (Fig. 5D).

28 Taken together the data indicate that Tsa1 affects PKA downstream of the second messenger cAMP.

### 29 **Tpk1 is glutathionylated on the conserved Cys243**

30 The above data indicate that Tsa1 suppresses PKA activity potentially by the intermediacy of both  
31 thioredoxins. Since this could be occurring through a redox-based mechanism we probed the effect of  
32 H<sub>2</sub>O<sub>2</sub> on the redox-state of Bcy1 and Tpk1 cysteine residues in Tsa1- or thioredoxin-deficient cells and  
33 in cells expressing Tsa1- or thioredoxin ‘cysteine-trap’ mutants (*tsa1C171S* or *trx2C34S*,  
34 respectively). We chose Tpk1 as it is the most highly expressed of the three PKA catalytic subunits.  
35 Neither Bcy1 nor Tpk1 displayed any redox-dependent change of electrophoretic mobility under non-  
36 reducing conditions (Fig. S3B-D). To search for Tpk1 post-translational modifications (PTMs), we  
37 undertook mass spectrometric analysis of tagged, affinity-purified His- and biotin-tagged Tpk1 (Tpk1-  
38 HB, (Tagwerker et al., 2006)). We searched both for known PTMs, i.e. oxidation, sulfinylation,  
39 glutathionylation and phosphorylation, and, via an unbiased open search approach, unknown PTMs  
40 (Supplemental Table S1, Fig. S3E-F). We then selected a set of peptides covering the most abundant  
41 Tpk1 PTMs and performed a quantitative analysis that employs label free quantification of MS1  
42 peaks, followed by a targeted MS/MS approach applying parallel reaction monitoring (PRM). We  
43 found that Tpk1Cys195 (Fig. S3G, Supplementary data Table S2) peptide was glutathionylated (-S-  
44 SG), in cells prior to exposure to H<sub>2</sub>O<sub>2</sub>. Label-free quantification and PRM suggested that the levels

1 of all three peptides bearing glutathionylated Cys195 decreased by 6 and 11-fold upon cell exposure to  
2 0.4 mM and 0.8 mM H<sub>2</sub>O<sub>2</sub>, respectively, suggesting that this peptide undergoes one or more unknown  
3 modifications in response to H<sub>2</sub>O<sub>2</sub> (Fig. S3G, Supplemental Tables S3 and S4).

4 Tpk1Cys243 containing peptides were also found heavily modified prior to H<sub>2</sub>O<sub>2</sub> exposure, with the  
5 presence of various combinations of Cys243 reduced (-SH), glutathionylated and sulfinylated (SO<sub>2</sub>H)  
6 forms, and of Thr241 bearing a phosphate group (Fig. 5F, Fig. S3F, S3H, Supplemental Table S2).  
7 The PRM signals of glutathionylated and non-glutathionylated peptides were of the same magnitude,  
8 suggesting that a significant fraction of Tpk1 is constitutively glutathionylated (Fig. 5F,  
9 Supplementary Table S4). This proportion may decrease upon H<sub>2</sub>O<sub>2</sub> addition, since the levels of the  
10 Thr241-phosphorylated and Cys243 glutathionylated peptide decreased 2.5-fold, whereas the Thr241  
11 unmodified Cys243 glutathionylated only barely changed upon H<sub>2</sub>O<sub>2</sub> treatment (1.4-fold increase, Fig.  
12 5F).

13 To further document redox modification of Tpk1, we used the PEG-maleimide assay in which  
14 oxidized cysteines are alkylated by PEG-maleimide, whereas, reduced cysteines are alkylated by N-  
15 ethylmaleimide (NEM) adding 5 kDa of molecular weight per oxidized cysteine. We observed that in  
16 addition to Tpk1, that migrated at the expected size of 50 kDa, another Tpk1 immunoreactive band of  
17 slower mobility was present prior to H<sub>2</sub>O<sub>2</sub> exposure, the intensity of which increased after exposure to  
18 the oxidant (Fig. 5G). This H<sub>2</sub>O<sub>2</sub>-inducible, mPEG-reactive band could correspond to Tpk1  
19 glutathionylation or to any other reversible Tpk1 Cys residue redox modifications. To evaluate the  
20 contribution of Tpk1Cys243 in the formation of this band, we replaced this residue with an alanine  
21 (*tpk1C243A tpk2Δ tpk3Δ*), and found that this band was still present, but no longer increased in  
22 intensity upon H<sub>2</sub>O<sub>2</sub> addition (Fig. S3I).

23 We conclude from these results that Tpk1 is glutathionylated on Cys195 and Cys243, the amount of  
24 both which decreases upon exposure to H<sub>2</sub>O<sub>2</sub>, and, in addition, that Tpk1 is phosphorylated at Thr241.  
25 In addition, Tpk1 undergoes further redox modification upon H<sub>2</sub>O<sub>2</sub> addition which targets the  
26 conserved Cys243.

### 27 **A Tpk1 homology models suggests that Cys243 glutathionylation decreases PKA activity**

28 In the mouse type II catalytic subunit, glutathionylation of Cys199, which is the residue homologous  
29 to Tpk1Cys243, reduces kinase activity *in vitro* by destabilizing the activation loop (Humphries, Deal,  
30 & Taylor, 2005; Huse & Kuriyan, 2002). We evaluated the effect of Cys243 glutathionylation by  
31 building a structural homology model of Tpk1, based on the mouse enzyme (Fig. 6A-B). Docking  
32 experiments suggested that Cys243-SSG stabilized the Thr241 dephosphorylated state by direct  
33 hydrogen bonding (Fig. 6C-E). Furthermore, in the presence of phosphorylated Thr241, glutathione  
34 moiety adopted a different position, now instead extending into the ATP binding pocket (Fig. 6C,F).  
35 Thr241 phosphorylation stabilizes the activation loop through hydrogen bonds to Arg209 and Lys233  
36 (Fig. 6C-D). These data thus indicate that Cys243 glutathionylation and Thr241 phosphorylation have  
37 reciprocal negative influences on the enzyme, the former disfavoring and the latter favoring kinase  
38 activity by destabilizing or stabilizing the activation loop, respectively. In analogy to the *in vitro*  
39 mouse enzyme studies we found that increased Tpk1-Cys243 redox modification upon H<sub>2</sub>O<sub>2</sub> addition  
40 (Fig. 5G, S3I) correlated with decreased levels of all three phosphorylated Tpk1-Thr241-peptides  
41 detected, and moderately increased levels of a non-phosphorylated Thr241 peptide (Fig. 5F, S3H).

42 Together with the quantitative MS data these results suggest that a significant proportion of Tpk1  
43 molecules are inhibited by glutathionylation, dephosphorylation and destabilization of the activation  
44 loop in unstressed cells.

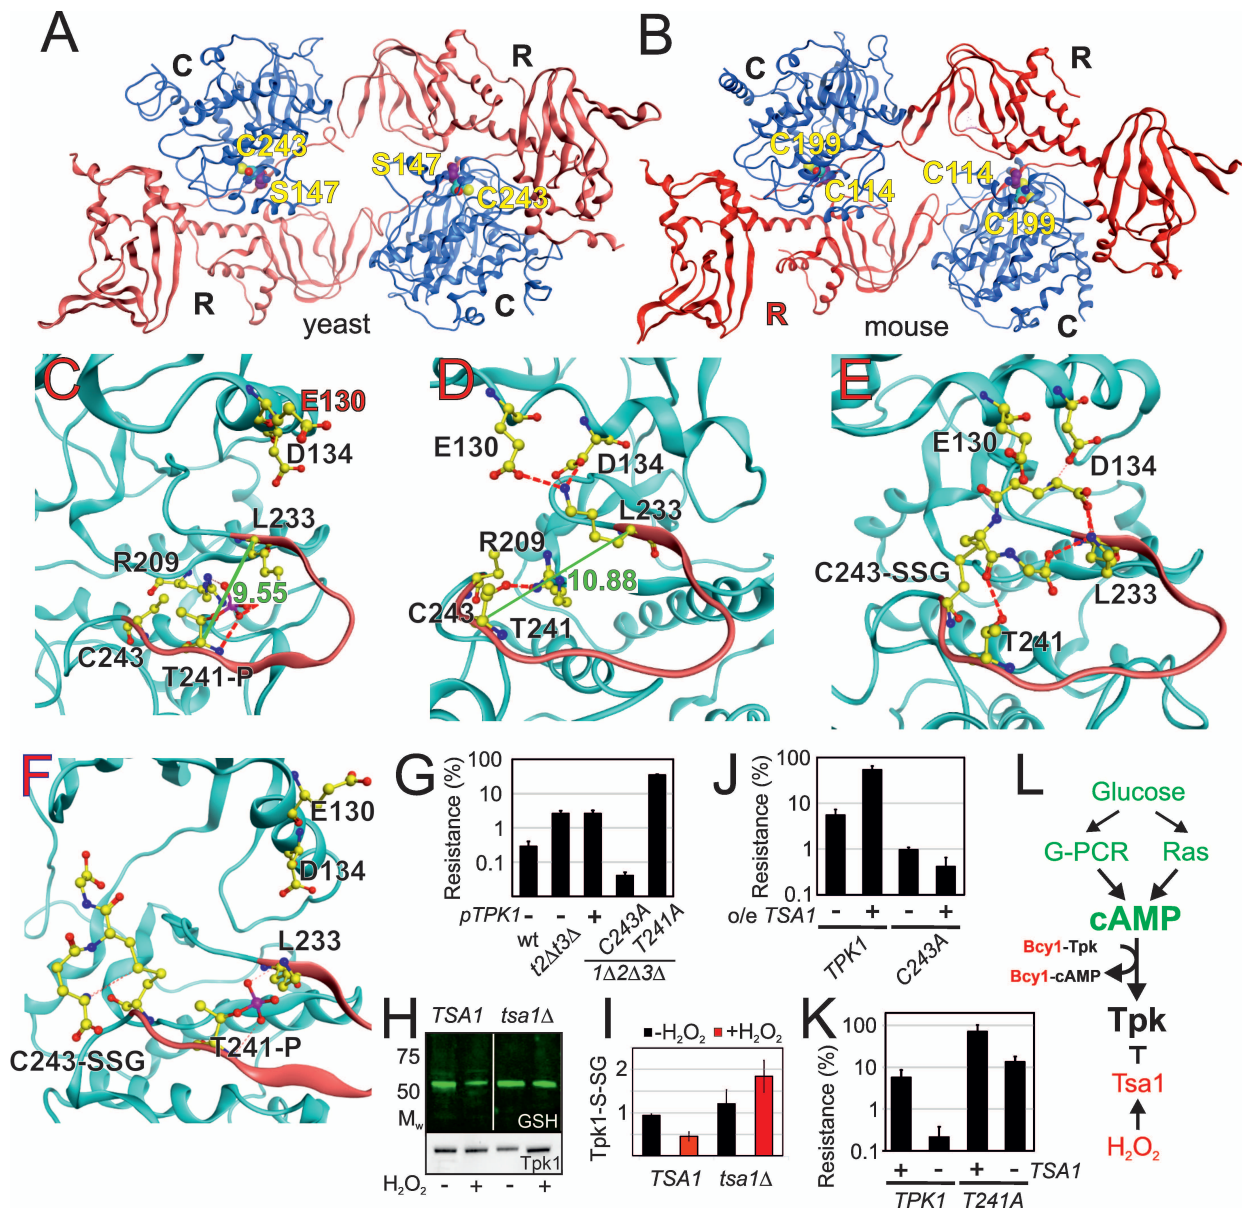

1 **Figure 6.** Tpk1 Cys243 redox-modification and Tsa1 inhibits PKA activity by dephosphorylating and  
2 destabilizing the activation loop. **A)** Homology model of the yeast holo-PKA enzyme consisting of two  
3 Tpk1 catalytic subunits (C) and two Bcy1 regulatory subunits (R). **B)** Structure of mouse type II PKA  
4 holoenzyme used to build the yeast structural homology model [PDB ID 3TNP, (P. Zhang et al.,  
5 2012)]. **C-F)** Amino acids in the activation loop (in red) of Tpk1 in the Thr241 phosphorylated Cys243  
6 non-modified (**C**), Thr241 non-phosphorylated Cys243 non-modified (**D**), Thr241 non-modified Cys243  
7 glutathionylated (**E**) and Thr241 phosphorylated Cys243 glutathionylated (**F**) states in the Tpk1  
8 structural homology model. The backbones are colored in light blue, carbon atoms in yellow, nitrogen  
9 atoms in blue, oxygen atoms in red and phosphor atoms in scarlet. The distance between Lys233 and  
10 phosphorylated Thr241 is 9.55 Å (**c**) whereas Lys233 and non-phosphorylated Thr241 reside 10.88 Å  
11 apart (**D**). **G, J)** H<sub>2</sub>O<sub>2</sub> resistance of the wild-type vector control (**G**, pRS313 or **J**, pRS403) or the  
12 indicated *TSA1*- or *tpk*-mutant strains. Strains in **J)** carry pRS316-*TPK1* or pRS316-*tpk1C243A* as the  
13 only PKA catalytic subunit (genomic *tpk1Δtpk2Δtpk3Δ* deletions, n=3). **H, I)** Glutathionylation of Tpk1-  
14 HB in *tpk2Δtpk3Δ* (*TSA1*) and *tpk2Δtpk3Δtsa1Δ* (*tsa1Δ*) as assayed by anti-glutathione immunoblot of  
15 immunoprecipitated Tpk1-HB in the absence of or 10 min following the addition of 0.4 mM H<sub>2</sub>O<sub>2</sub>.  
16 Extracts were separated under non-reducing (NR) or reducing (R) conditions. **J)** H<sub>2</sub>O<sub>2</sub> resistance of  
17 *tpk1Δtpk2Δtpk3Δ* and *tpk1Δtpk2Δtpk3Δtsa1Δ* cells transformed with pRS313-*TPK1* or pRS313-  
18 *tpk1T241A* as indicated (n=3). **K)** Overview of mechanisms by which glucose and H<sub>2</sub>O<sub>2</sub> impinge on  
19 PKA activity. In green activators and in red inhibitors.

1 **Tpk1 Cys243 glutathionylation and dephosphorylation of the activation loop of PKA increases**  
2 **H<sub>2</sub>O<sub>2</sub> resistance**

3 To assess the physiological impact of the modified Tpk1 Cys195 and Cys243, we tested the effect of  
4 alanine substitution of these residues in cells expressing *TPK1* as the only catalytic subunit  
5 (*tpk2Δtpk3Δ*). Both these mutants supported a normal growth (Fig. S4A-C) but, interestingly  
6 *tpk1C243A*, but not *tpk1C195A*, substitution rendered cells hyper-sensitive to H<sub>2</sub>O<sub>2</sub> (Fig. 6G, S4D).  
7 This corroborates the notion that Tpk1 cysteine 243 glutathionylation represses PKA activity, which is  
8 needed for H<sub>2</sub>O<sub>2</sub> resistance.

9 We also assayed the phenotypes of *tpk1T241A* mutation in otherwise Tpk2 and Tpk3-lacking cells,  
10 since phosphorylation of this residue decreased upon exposure to H<sub>2</sub>O<sub>2</sub>. Whereas *tpk1T241A* mutant  
11 cells grew at normal rates (Fig. S4A-C) they were resistant to H<sub>2</sub>O<sub>2</sub> (Fig. 6G), in keeping with the idea  
12 that reduced phosphorylation of Thr241 moderately decreases PKA activity and makes cells resistant  
13 to H<sub>2</sub>O<sub>2</sub>.

14 **Tsa1-mediated H<sub>2</sub>O<sub>2</sub> resistance requires Tpk1C243 and the destabilization of the Tpk1**  
15 **activation loop**

16 We next sought to evaluate the link between Tsa1 and Tpk1 glutathionylation by immunoprecipitating  
17 Tpk1-HB from Tsa1-proficient and -deficient cells and assayed glutathionylation by anti-glutathione  
18 immunoblot (Fig. 6H-I). Whereas Tpk1 glutathionylation seemed unaffected in the Tsa1-mutant in the  
19 absence of H<sub>2</sub>O<sub>2</sub>, the decreased Tpk1 glutathionylation seen in the wild-type was lost, suggesting a key  
20 role of Tsa1 in Tpk1 redox status upon H<sub>2</sub>O<sub>2</sub> addition.

21 To evaluate the importance of Tpk1C243 in Tsa1-mediated H<sub>2</sub>O<sub>2</sub> resistance we assayed the H<sub>2</sub>O<sub>2</sub>  
22 resistance of *TSA1/TSAl* merodiploid and *TSAl*/vector control cells expressing *TPK1* or *tpk1C243A* as  
23 the sole PKA catalytic subunits. Interestingly, in support for a crucial role of C243-dependent redox  
24 modification in Tsa1-mediated H<sub>2</sub>O<sub>2</sub> resistance, Tpk1C243 was essential for the H<sub>2</sub>O<sub>2</sub> resistance  
25 conferred by an extra copy of the *TSAl* gene (Fig. 6J).

26 Finally, we sought to evaluate whether dephosphorylation of the activation loop in the catalytic  
27 subunit of PKA contributed to Tsa1-dependent H<sub>2</sub>O<sub>2</sub> resistance. To this end, we expressed the  
28 *tpk1T241A* allele as the sole catalytic subunit in cells lacking Tsa1 and assessed H<sub>2</sub>O<sub>2</sub> resistance. In  
29 support of a crucial role for dephosphorylation of the Tpk1 activation loop in Tsa1-mediated H<sub>2</sub>O<sub>2</sub>  
30 resistance the *tpk1T241A* allele was able to partly overcome the H<sub>2</sub>O<sub>2</sub> sensitivity of *tsa1Δ* cells (Fig.  
31 6K).

32 We conclude that the dominant cytosolic yeast peroxiredoxin Tsa1 impacts on H<sub>2</sub>O<sub>2</sub> resistance via a  
33 mechanism involving redox modulation of a conserved cysteine in and dephosphorylation of the  
34 activation loop in the catalytic subunit of protein kinase A.

## 1 Discussion

2 The ability of caloric restriction to extend the lifespan of organisms from yeast to primates has  
3 attracted much attention in the aging field. Since the incidence of many major age-related diseases  
4 such as cancer, diabetes and neurodegeneration is also reduced upon caloric restriction (Mattison et al.,  
5 2017), there is hope that reducing caloric intake or pharmaceutically targeting key molecular  
6 mechanisms underlying its beneficial health effects will fuel healthy, disease-free ageing.

7 There is widespread consensus in the aging-field that reduced nutrient and/or growth signaling through  
8 less than a handful of conserved pathways (e.g. insulin/IGF-1, TOR and protein kinase A) is  
9 instrumental for caloric restriction to slow down aging. In contrast, there is much more controversy  
10 regarding which downstream effector pathways/processes that are the most important in regulating the  
11 rate of aging. This could be a reflection of nutrient signaling coordinating the needs of many different  
12 cellular processes, the exact identity of which may differ slightly between different organisms and/or  
13 CR protocols (Lamming & Anderson, 2014). The fact that several of the target processes proposed (eg  
14 vacuolar pH control and protein homeostasis) reciprocally have been suggested to feed-back control  
15 nutrient signaling in themselves (Molin & Demir, 2014; Yao et al., 2015; N. Zhang, Quan, Rash, &  
16 Oliver, 2013) has caused further controversy regarding which mechanisms are most important in  
17 slowing down aging. A modern integrative model of aging, however, posits that different pathways  
18 and/or organelles are intricately interconnected into so called integrons. Interconnectivity allows the  
19 function of subsystems that fail to be compensated for by others, but also, conversely, that the failure  
20 of one subsystem can lead to the progressive decline of all systems through sequential collapse of  
21 homeostasis (Dillin, Gottschling, & Nystrom, 2014).

22 Peroxiredoxins have emerged as regulators of aging stimulating longevity in organisms from yeast to  
23 multicellulars such as worms, flies and mice (De Haes et al., 2014; Hanzen et al., 2016; Lee et al.,  
24 2009; Molin et al., 2011; Olahova & Veal, 2015). The fact that peroxiredoxins are conserved in  
25 organisms from bacteria to humans and that they can be targeted pharmaceutically to slow down aging  
26 suggests that they may constitute promising targets for the development of drugs against age-related  
27 disease.

28 We have previously shown that peroxiredoxin activity is crucial for molecular chaperones to bind to  
29 aggregates forming in aged yeast cells (Hanzen et al., 2016), thus connecting peroxiredoxins to an  
30 aging factor conserved in many organisms. We linked this role to the sulfinylation of the primary  
31 catalytic cysteine and enzyme double decamerisation, thus providing an *in vivo* function in a distinct  
32 chaperone network of this *in vitro* chaperone-active peroxiredoxin form (Jang et al., 2004; Noichri et  
33 al., 2015). However, we previously observed that H<sub>2</sub>O<sub>2</sub> resistance in CR cells requires both catalytic  
34 cysteines (Molin et al., 2011). In addition, metformin leads to increased accumulation of disulfide-  
35 linked Prdx-2 in worms, raising the question of what the impact of peroxiredoxin catalytic cycling, or  
36 both the peroxidatic and resolving cysteines, on aging is. Data reported in this study demonstrate a key  
37 role of both cysteines of Tsa1 in slowing down aging, thus reinforcing the correlation between  
38 peroxiredoxin-stimulated longevity and hydrogen peroxide resistance. Surprisingly, however, the  
39 importance of the two peroxiredoxin catalytic cysteines in both aging and H<sub>2</sub>O<sub>2</sub> resistance does not  
40 stem from a role in H<sub>2</sub>O<sub>2</sub> scavenging. Taken together with the Tsa1-dependent increased lifespan in  
41 cells grown in the continuous presence of low levels of H<sub>2</sub>O<sub>2</sub> (Goulev et al., 2017), these data clearly  
42 demonstrate that the anti-aging effect of peroxiredoxins originates in H<sub>2</sub>O<sub>2</sub> signaling.

43 In this respect the key role of both Tsa1 catalytic cysteines in the regulation of the nutrient signaling  
44 enzyme PKA is highly interesting. By acting directly at the structurally highly conserved catalytic

1 subunits of protein kinases (Huse & Kuriyan, 2002), peroxiredoxins can override conventional second-  
2 messenger controlled upstream signaling mechanisms and directly modulate protein kinase signaling  
3 as a function of the level of H<sub>2</sub>O<sub>2</sub> (Fig. 6L).

4 This idea is supported by our data suggesting a direct Tsa1-Tpk1 physical interaction and a  
5 requirement for Cys243 in H<sub>2</sub>O<sub>2</sub> resistance mediated by mild Tsa1 overexpression. Our data suggest a  
6 model in which a significant proportion of the PKA catalytic subunit molecules are glutathionylated *in*  
7 *vivo*. The decreased ability of *tpk1C243A* mutant cells to resist H<sub>2</sub>O<sub>2</sub> reflects enzyme hyperactivity and  
8 PKA signaling normally being restrained by glutathionylation. The homologous cysteine in murine  
9 type II PKA (Cys199) has previously been shown to be inactivated upon *in vitro* glutathionylation  
10 (Humphries et al., 2005; Humphries, Juliano, & Taylor, 2002). In addition, the homologous cysteine in  
11 type II rat PKA forms a disulfide bond with the regulatory subunit (de Pina et al., 2008). Intersubunit  
12 disulfide bond formation decreased PKA activity already at very low levels of H<sub>2</sub>O<sub>2</sub> *in vitro* (1 μM)  
13 highlighting the importance of this cysteine in oxidative PKA regulation. However, the cysteine in the  
14 regulatory subunit is only conserved in vertebrates. In contrast, the catalytic subunit cysteine is  
15 conserved in PKA across eukaryotes (de Pina et al., 2008) suggesting that redox-modification of the  
16 catalytic subunit is the more conserved mechanism of oxidative PKA control. In addition, whereas  
17 intersubunit disulfide formation locks the enzyme in an inactive state our data indicate that  
18 destabilization of the substrate binding activation loop represents a more subtle regulatory mechanism  
19 to fine-tune PKA activity upon H<sub>2</sub>O<sub>2</sub> addition (Fig. 6G, S4C). A pressing question for the future will  
20 be to identify the specific peroxiredoxin-mediated cysteine modification reducing PKA activity upon  
21 H<sub>2</sub>O<sub>2</sub> addition.

22 Interestingly, other studies have reported that the activities of both protein kinase G and A are  
23 stimulated by H<sub>2</sub>O<sub>2</sub> (Burgoyne et al., 2007; Burgoyne et al., 2015). Specifically, the I alpha isoform of  
24 protein kinase G in rat cells, PKGIalpha, formed a disulfide linking its two subunits in cells exposed to  
25 exogenous H<sub>2</sub>O<sub>2</sub>, which activated the enzyme (Burgoyne et al., 2007). Thus the regulation of  
26 PKA/PKG by H<sub>2</sub>O<sub>2</sub> involves the same conserved cysteine in the catalytic subunit but leads to opposite  
27 effects. In a similar fashion *in vitro* studies suggest that the energy-sensing kinase AMPK is activated  
28 upon glutathionylation (Klaus et al., 2013). Thus the impact of oxidants on protein kinases seems to be  
29 different for different kinases.

30 In worms and mammals, the endoplasmic reticulum (ER) transmembrane kinase Ire-1 is regulated by  
31 oxidation of another conserved Cys residue in the activation loop, situated 11 residues upstream of the  
32 here described PKA cysteine, at position +2 relative to the Mg<sup>2+</sup>-coordinating DFG motif (Hourihan,  
33 Moronetti Mazzeo, Fernandez-Cardenas, & Blackwell, 2016). Ire-1 was shown to be sulfenylated by  
34 ER and mitochondrial H<sub>2</sub>O<sub>2</sub>, as well as H<sub>2</sub>O<sub>2</sub> produced by an NADPH oxidase in response to arsenite  
35 stress, in a manner activating the upstream mitogen activated protein kinase kinase kinase (MAPKKK)  
36 NSY-1 in the p38 stress-activated MAPK pathway. The switch between these two mutually exclusive  
37 functions of IRE-1 mediated by the sulfenylation of a unique cysteine residue supports the idea of  
38 cysteine oxidation being able to profoundly alter protein kinase function.

39 In summary data presented here and in a previous study (Hanzen et al., 2016) point to two different  
40 mechanisms by which peroxiredoxins counteract aging and age-related disease (Fig. 7), one involving  
41 catalytic cycling and the inhibition of nutrient-related kinase signaling (Fig. 7A-B). This mechanism  
42 appears to be critical for yeast to sustain normal longevity and is probably involved also in the ability  
43 of CR to slow down aging, since CR stimulated H<sub>2</sub>O<sub>2</sub> resistance in a manner dependent on Tsa1

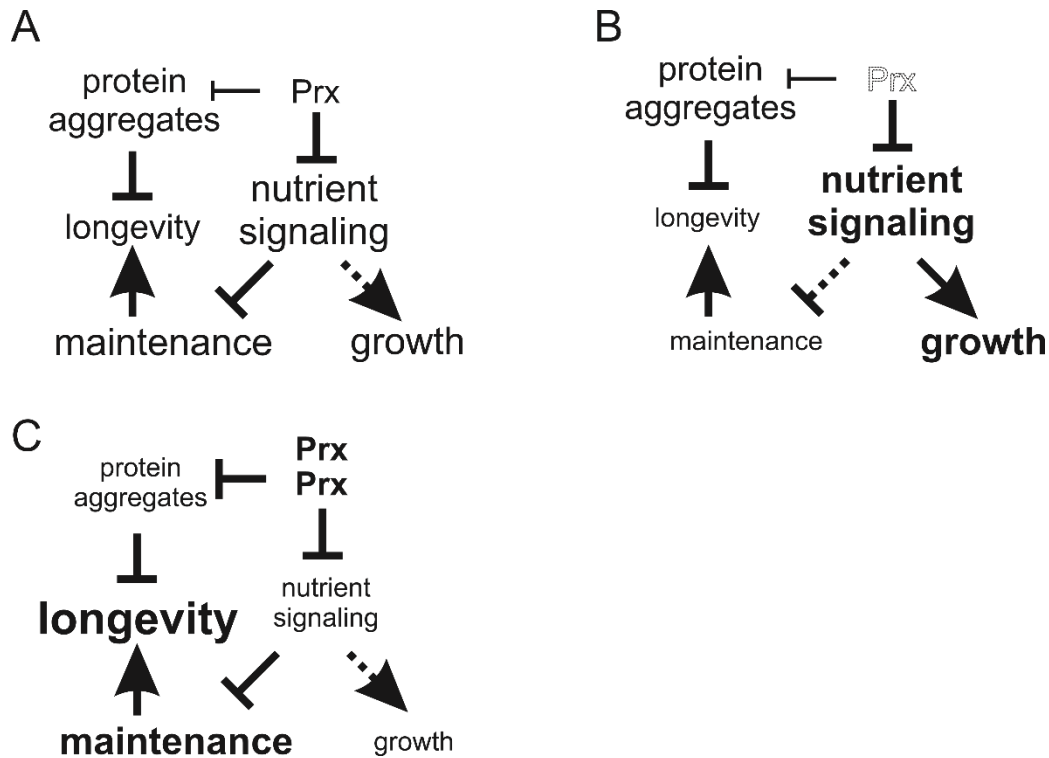

1  
2 **Figure 7.** Model of the mechanisms by which altered peroxiredoxin levels impacts on aging. In the first  
3 mechanism peroxiredoxin-dependent redox-signaling impacts in an unconventional manner on the  
4 PKA nutrient signaling kinase (this study) and in the other on proteostasis (Hanzen et al., 2016). **A)** In  
5 wild-type cells Tsa1 catalytic cycling maintains longevity by decreasing PKA-dependent nutrient  
6 signaling leading to the stimulation of maintenance but at the expense of growth. **B)** In contrast, in  
7 cells lacking Tsa1 nutrient signaling is aberrantly increased leading to reduced maintenance and  
8 increased growth. **C)** Enforced expression of the peroxiredoxin Tsa1 slows down aging both by  
9 repressing nutrient signaling (this study) and by stimulating protein quality control mechanisms to  
10 reduce the levels of damaged and aggregated protein (Hanzen et al., 2016).

11 (Hanzen et al., 2016)catalytic cycling (Molin et al., 2011). Along the same lines, metformin-stimulated  
12 longevity in worms also seems to involve increased Prdx-2 catalytic cycling (De Haes et al., 2014).  
13 The second mechanism by which peroxiredoxins may inhibit aging and age-related disease is by  
14 stimulating chaperone-dependent protein quality control to counteract protein aggregation [Fig. 7C,  
15 (Hanzen et al., 2016)]. In particular, we showed that Tsa1 sulfinylation was necessary to guide the  
16 molecular chaperones Hsp70 and Hsp104 to aggregates forming in aged and H<sub>2</sub>O<sub>2</sub>-treated cells. This  
17 anti-aging mechanism thus seems to be independent of the here described role in inhibiting nutrient  
18 signaling which instead appears to be linked to Tsa1 catalytic cycling. The requirement of both  
19 reduced PKA nutrient signaling (Pde2, this study) and normal protein quality control [e.g. cytosolic  
20 Hsp70 activity by Ssa1/2 (Hanzen et al., 2016)] for mild Tsa1 overproduction to extend lifespan  
21 support a requirement of both these mechanisms in the ability of enhanced peroxiredoxin levels to  
22 extend lifespan (Fig. 7C).

23 In the integrative view of aging, it can be assumed that a key role in the aging process is executed by  
24 cellular components and/or pathways that assimilate information from different subsystems such as the  
25 above described nutrient signaling pathways, the latter which would constitute excellent candidates of  
26 acting as such integrators. In agreement with a key role of PKA in yeast integrative homeostasis a  
27 genome-wide identification of genes controlling PKA regulatory-catalytic subunit interaction, and  
28 hence PKA activity, found a striking number of known targets of PKA, involved in eg glycogen



1 accumulation, filamentous growth and amino-acid biosynthesis (Filteau et al., 2015). Hence, the  
2 involvement of central nutrient signaling pathways in the mechanisms by which peroxiredoxins slow  
3 down aging is in agreement with the integrative model of aging and suggest that also other anti-aging  
4 regimens impact on nutrient signaling.

5

## 6 **Acknowledgements**

7 We are grateful to Michel B Toledano for valuable comments on the manuscript and Karin  
8 Voordeckers, Joseph Heitman and Robert J Deschenes for reagents. This work was supported by  
9 grants from the Swedish research Council VR, Cancerfonden, the Foundation Olle Engkvist  
10 byggmästare and Carl Tryggers stiftelse (all to MM).

11

## 12 **Competing interests**

13 The authors declare that they have no conflict of interest.

14

## 15 **Author contributions**

16 Conceptualization M.M.; Methodology M.M., W.R., M.H., C.G., N.W., J.L.; Investigation F.R., C.P.,  
17 M.M., C.A., S.H., G.L.; Writing – Original Draft M.M., F.R.; Writing – Review and Editing, M.M.,  
18 F.R., T.N., W.R., M.G.; Funding Acquisition M.M., M.H., T.N., M.G.; Supervision, M.M., M.G.

19

## 20 **References**

- 21 Abraham, M. J., Murtola, T., Schultz, R., Pall, S., Smith, J. C., Hess, B., & Lindahl, E. (2015).  
22 GROMACS: High performance molecular simulations through multi-level parallelism from  
23 laptops to supercomputers. *SoftwareX*, 54(7), 1932-1940.
- 24 Alic, N., & Partridge, L. (2011). Death and dessert: nutrient signalling pathways and ageing. *Curr*  
25 *Opin Cell Biol*, 23(6), 738-743. doi:10.1016/j.ceb.2011.07.006
- 26 Bilan, D. S., Pase, L., Joosen, L., Gorokhovatsky, A. Y., Ermakova, Y. G., Gadella, T. W. J., . . .  
27 Belousov, V. V. (2013). HyPer-3: A Genetically Encoded H<sub>2</sub>O<sub>2</sub> Probe with Improved  
28 Performance for Ratiometric and Fluorescence Lifetime Imaging. *ACS chemical biology*, 8(3),  
29 535-542. doi:10.1021/cb300625g
- 30 Biteau, B., Labarre, J., & Toledano, M. B. (2003). ATP-dependent reduction of cysteine-sulphinic acid  
31 by *S. cerevisiae* sulphiredoxin. *Nature*, 425(6961), 980-984.
- 32 Bodvard, K., Peeters, K., Roger, F., Romanov, N., Igarria, A., Toledano, M. B., . . . Molin, M. (2017).  
33 Light-sensing via hydrogen peroxide and a peroxiredoxin. *Nat Commun*, 8, 14791.  
34 doi:10.1038/ncomms14791
- 35 Burgoyne, J. R., Madhani, M., Cuello, F., Charles, R. L., Brennan, J. P., Schroder, E., . . . Eaton, P.  
36 (2007). Cysteine redox sensor in PKGI $\alpha$  enables oxidant-induced activation. *Science*,  
37 317(5843), 1393-1397. doi:10.1126/science.1144318
- 38 Burgoyne, J. R., Rudyk, O., Cho, H. J., Pryszyzna, O., Hathaway, N., Weeks, A., . . . Eaton, P.  
39 (2015). Deficient angiogenesis in redox-dead Cys17Ser PKARI $\alpha$  knock-in mice. *Nat*  
40 *Commun*, 6, 7920. doi:10.1038/ncomms8920

- 1 Colombo, S., & Martegani, E. (2014). Methods to study the Ras2 protein activation state and the  
2 subcellular localization of Ras-GTP in *Saccharomyces cerevisiae*. *Methods Mol Biol*, 1120,  
3 391-405. doi:10.1007/978-1-62703-791-4\_24
- 4 De Haes, W., Frooninckx, L., Van Assche, R., Smolders, A., Depuydt, G., Billen, J., . . . Temmerman,  
5 L. (2014). Metformin promotes lifespan through mitohormesis via the peroxiredoxin PRDX-2.  
6 *Proc Natl Acad Sci U S A*, 111(24), E2501-2509. doi:10.1073/pnas.1321776111
- 7 de Pina, M. Z., Vazquez-Meza, H., Pardo, J. P., Rendon, J. L., Villalobos-Molina, R., Riveros-Rosas,  
8 H., & Pina, E. (2008). Signaling the signal, cyclic AMP-dependent protein kinase inhibition  
9 by insulin-formed H<sub>2</sub>O<sub>2</sub> and reactivation by thioredoxin. *J Biol Chem*, 283(18), 12373-12386.  
10 doi:10.1074/jbc.M706832200
- 11 Dillin, A., Gottschling, D. E., & Nystrom, T. (2014). The good and the bad of being connected: the  
12 integrons of aging. *Curr Opin Cell Biol*, 26, 107-112. doi:10.1016/j.ceb.2013.12.003
- 13 Filteau, M., Diss, G., Torres-Quiroz, F., Dube, A. K., Schrafl, A., Bachmann, V. A., . . . Landry, C. R.  
14 (2015). Systematic identification of signal integration by protein kinase A. *Proc Natl Acad Sci*  
15 *U S A*, 112(14), 4501-4506. doi:10.1073/pnas.1409938112
- 16 Fontan-Lozano, A., Lopez-Lluch, G., Delgado-Garcia, J. M., Navas, P., & Carrion, A. M. (2008).  
17 Molecular bases of caloric restriction regulation of neuronal synaptic plasticity. *Mol*  
18 *Neurobiol*, 38(2), 167-177.
- 19 Fontana, L., Partridge, L., & Longo, V. D. (2010). Extending healthy life span--from yeast to humans.  
20 *Science*, 328(5976), 321-326. doi:10.1126/science.1172539
- 21 Fontana, L., Partridge, L., and Longo, V.D. (2010). Dietary Restriction, Growth Factors and Aging:  
22 from yeast to humans. *Science*, 328(5679), 321-326.
- 23 Garrett, S., & Broach, J. (1989). Loss of Ras activity in *Saccharomyces cerevisiae* is suppressed by  
24 disruptions of a new kinase gene, YAKI, whose product may act downstream of the cAMP-  
25 dependent protein kinase. *Genes Dev*, 3(9), 1336-1348.
- 26 Goulev, Y., Morlot, S., Matifas, A., Huang, B., Molin, M., Toledano, M., & Charvin, G. (2017).  
27 Nonlinear feedback drives homeostatic plasticity in H<sub>2</sub>O<sub>2</sub> stress response. *Elife*, 6, 23791.  
28 doi:<http://dx.doi.org/10.7554/eLife.23971>
- 29 Hanzen, S., Vielfort, K., Yang, J., Roger, F., Andersson, V., Zamarbide-Fores, S., . . . Nystrom, T.  
30 (2016). Lifespan Control by Redox-Dependent Recruitment of Chaperones to Misfolded  
31 Proteins. *Cell*, 166(1), 140-151. doi:10.1016/j.cell.2016.05.006
- 32 Heilbronn, L. K., de Jonge, L., Frisard, M. I., DeLany, J. P., Larson-Meyer, D. E., Rood, J., . . .  
33 Pennington, C. T. (2006). Effect of 6-month calorie restriction on biomarkers of longevity,  
34 metabolic adaptation, and oxidative stress in overweight individuals: a randomized controlled  
35 trial. *JAMA*, 295(13), 1539-1548. doi:10.1001/jama.295.13.1539
- 36 Hourihan, J. M., Moronetti Mazzeo, L. E., Fernandez-Cardenas, L. P., & Blackwell, T. K. (2016).  
37 Cysteine Sulfenylation Directs IRE-1 to Activate the SKN-1/Nrf2 Antioxidant Response. *Mol*  
38 *Cell*, 63(4), 553-566. doi:10.1016/j.molcel.2016.07.019
- 39 Humphries, K. M., Deal, M. S., & Taylor, S. S. (2005). Enhanced dephosphorylation of cAMP-  
40 dependent protein kinase by oxidation and thiol modification. *J Biol Chem*, 280(4), 2750-  
41 2758. doi:10.1074/jbc.M410242200
- 42 Humphries, K. M., Juliano, C., & Taylor, S. S. (2002). Regulation of cAMP-dependent protein kinase  
43 activity by glutathionylation. *J Biol Chem*, 277(45), 43505-43511.  
44 doi:10.1074/jbc.M207088200
- 45 Huse, M., & Kuriyan, J. (2002). The conformational plasticity of protein kinases. *Cell*, 109(3), 275-  
46 282.
- 47 Jacobson, M. P., Friesner, R. A., Xiang, Z., & Honig, B. (2002). On the role of the crystal environment  
48 in determining protein side-chain conformations. *J Mol Biol*, 320(3), 597-608.
- 49 Jang, H. H., Lee, K. O., Chi, Y. H., Jung, B. G., Park, S. K., Park, J. H., . . . Lee, S. Y. (2004). Two  
50 enzymes in one; two yeast peroxiredoxins display oxidative stress-dependent switching from a  
51 peroxidase to a molecular chaperone function. *Cell*, 117(5), 625-635.
- 52 Kenyon, C. J. (2010). The genetics of ageing. *Nature*, 464(7288), 504-512. doi:nature08980 [pii]  
53 10.1038/nature08980
- 54 Klaus, A., Zorman, S., Berthier, A., Polge, C., Ramirez, S., Michelland, S., . . . Schlattner, U. (2013).  
55 Glutathione S-transferases interact with AMP-activated protein kinase: evidence for S-

- 1 glutathionylation and activation in vitro. *PLoS One*, 8(5), e62497.  
2 doi:10.1371/journal.pone.0062497
- 3 Kong, A. T., Leprevost, F. V., Avtonomov, D. M., Mellacheruvu, D., & Nesvizhskii, A. I. (2017).  
4 MSFragger: ultrafast and comprehensive peptide identification in mass spectrometry-based  
5 proteomics. *Nat Methods*, 14(5), 513-520. doi:10.1038/nmeth.4256
- 6 Lamming, D. W., & Anderson, R. M. (2014). Metabolic Effects of Caloric Restriction. In *eLS*: John  
7 Wiley & Sons, Ltd.
- 8 Lee, K. S., Iijima-Ando, K., Iijima, K., Lee, W. J., Lee, J. H., Yu, K., & Lee, D. S. (2009).  
9 JNK/FOXO-mediated neuronal expression of fly homologue of peroxiredoxin II reduces  
10 oxidative stress and extends life span. *J Biol Chem*, 284(43), 29454-29461. doi:M109.028027  
11 [pii] 10.1074/jbc.M109.028027
- 12 Leichert, L. I., & Dick, T. P. (2015). Incidence and physiological relevance of protein thiol switches.  
13 *Biol Chem*, 396(5), 389-399. doi:10.1515/hsz-2014-0314
- 14 Lin, S. J., Defossez, P. A., & Guarente, L. (2000). Requirement of NAD and SIR2 for life-span  
15 extension by calorie restriction in *Saccharomyces cerevisiae*. *Science*, 289(5487), 2126-2128.
- 16 Longo, V. D., Shadel, G. S., Kaerberlein, M., & Kennedy, B. (2012). Replicative and chronological  
17 aging in *Saccharomyces cerevisiae*. *Cell metabolism*, 16(1), 18-31.  
18 doi:10.1016/j.cmet.2012.06.002
- 19 Mashhoon, N., Carmel, G., Pflugrath, J. W., & Kuret, J. (2001). Structure of the unliganded cAMP-  
20 dependent protein kinase catalytic subunit from *Saccharomyces cerevisiae*. *Arch Biochem  
21 Biophys*, 387(1), 11-19. doi:10.1006/abbi.2000.2241
- 22 Mattison, J. A., Colman, R. J., Beasley, T. M., Allison, D. B., Kemnitz, J. W., Roth, G. S., . . .  
23 Anderson, R. M. (2017). Caloric restriction improves health and survival of rhesus monkeys.  
24 *Nat Commun*, 8, 14063. doi:10.1038/ncomms14063
- 25 Molin, M., & Demir, A. B. (2014). Linking Peroxiredoxin and Vacuolar-ATPase Functions in Calorie  
26 Restriction-Mediated Life Span Extension. *Int J Cell Biol*, 2014, 12. doi:10.1155/2014/913071
- 27 Molin, M., Yang, J., Hanzen, S., Toledano, M. B., Labarre, J., & Nystrom, T. (2011). Life span  
28 extension and H<sub>2</sub>O<sub>2</sub>-resistance elicited by caloric restriction require the peroxiredoxin Tsa1 in  
29 *Saccharomyces cerevisiae*. *Mol Cell*, 43(5), 823-833. doi:10.1016/j.molcel.2011.07.027
- 30 Neumann, C. A., Krause, D. S., Carman, C. V., Das, S., Dubey, D. P., Abraham, J. L., . . . Van Etten,  
31 R. A. (2003). Essential role for the peroxiredoxin Prdx1 in erythrocyte antioxidant defence  
32 and tumour suppression. *Nature*, 424(6948), 561-565.
- 33 Noichri, Y., Palais, G., Ruby, V., D'Autreaux, B., Delaunay-Moisan, A., Nystrom, T., . . . Toledano,  
34 M. B. (2015). In vivo parameters influencing 2-Cys Prx oligomerization: The role of enzyme  
35 sulfinylation. *Redox Biol*, 6, 326-333. doi:10.1016/j.redox.2015.08.011
- 36 Nystrom, T., Yang, J., & Molin, M. (2012). Peroxiredoxins, gerontogenes linking aging to genome  
37 instability and cancer. *Genes Dev*, 26(18), 2001-2008. doi:10.1101/gad.200006.112
- 38 Olahova, M., & Veal, E. A. (2015). A peroxiredoxin, PRDX-2, is required for insulin secretion and  
39 insulin/IIS-dependent regulation of stress resistance and longevity. *Aging Cell*, 14(4), 558-  
40 568. doi:10.1111/acel.12321
- 41 Peeters, K., Van Leemputte, F., Fischer, B., Bonini, B. M., Quezada, H., Tsytlonok, M., . . . Thevelein,  
42 J. M. (2017). Fructose-1,6-bisphosphate couples glycolytic flux to activation of Ras. *Nat  
43 Commun*, 8(1), 922. doi:10.1038/s41467-017-01019-z
- 44 Ponder, J. W., & Case, D. A. (2003). Force fields for protein simulations. *Adv Protein Chem*, 66, 27-  
45 85.
- 46 Rappsilber, J., Mann, M., & Ishihama, Y. (2007). Protocol for micro-purification, enrichment, pre-  
47 fractionation and storage of peptides for proteomics using StageTips. *Nat Protoc*, 2(8), 1896-  
48 1906. doi:10.1038/nprot.2007.261
- 49 Reiter, W., Anrather, D., Dohnal, I., Pichler, P., Veis, J., Grotli, M., . . . Ammerer, G. (2012).  
50 Validation of regulated protein phosphorylation events in yeast by quantitative mass  
51 spectrometry analysis of purified proteins. *Proteomics*, 12(19-20), 3030-3043.  
52 doi:10.1002/pmic.201200185
- 53 Santangelo, G. M. (2006). Glucose signaling in *Saccharomyces cerevisiae*. *Microbiol Mol Biol Rev*,  
54 70(1), 253-282.

- 1 Schulz, T. J., Zarse, K., Voigt, A., Urban, N., Birringer, M., & Ristow, M. (2007). Glucose restriction  
2 extends *Caenorhabditis elegans* life span by inducing mitochondrial respiration and increasing  
3 oxidative stress. *Cell metabolism*, 6(4), 280-293. doi:10.1016/j.cmet.2007.08.011
- 4 Smith, A., Ward, M. P., & Garrett, S. (1998). Yeast PKA represses Msn2p/Msn4p-dependent gene  
5 expression to regulate growth, stress response and glycogen accumulation. *Embo J*, 17(13),  
6 3556-3564.
- 7 Sohal, R. S., & Forster, M. J. (2014). Caloric restriction and the aging process: a critique. *Free Radic*  
8 *Biol Med*, 73, 366-382. doi:10.1016/j.freeradbiomed.2014.05.015
- 9 Stocker, S., Van Laer, K., Mijuskovic, A., & Dick, T. P. (2017). The Conundrum of Hydrogen  
10 Peroxide Signaling and the Emerging Role of Peroxiredoxins as Redox Relay Hubs. *Antioxid*  
11 *Redox Signal*. doi:10.1089/ars.2017.7162
- 12 Sun, J., Kale, S. P., Childress, A. M., Pinswasdi, C., & Jazwinski, S. M. (1994). Divergent roles of  
13 RAS1 and RAS2 in yeast longevity. *J Biol Chem*, 269(28), 18638-18645.
- 14 Tagwerker, C., Flick, K., Cui, M., Guerrero, C., Dou, Y., Auer, B., . . . Kaiser, P. (2006). A tandem  
15 affinity tag for two-step purification under fully denaturing conditions: application in ubiquitin  
16 profiling and protein complex identification combined with in vivocross-linking. *Mol Cell*  
17 *Proteomics*, 5(4), 737-748. doi:10.1074/mcp.M500368-MCP200
- 18 Toda, T., Cameron, S., Sass, P., Zoller, M., & Wigler, M. (1987). Three different genes in *S.*  
19 *cerevisiae* encode the catalytic subunits of the cAMP-dependent protein kinase. *Cell*, 50(2),  
20 277-287. doi:0092-8674(87)90223-6 [pii]
- 21 Toda, T., Uno, I., Ishikawa, T., Powers, S., Kataoka, T., Broek, D., . . . Wigler, M. (1985). In yeast,  
22 RAS proteins are controlling elements of adenylate cyclase. *Cell*, 40(1), 27-36.
- 23 Wilson, R. B., & Tatchell, K. (1988). SRA5 encodes the low-Km cyclic AMP phosphodiesterase of  
24 *Saccharomyces cerevisiae*. *Mol Cell Biol*, 8(1), 505-510.
- 25 Vizcaino, J. A., Csordas, A., del-Toro, N., Dianes, J. A., Griss, J., Lavidas, I., . . . Hermjakob, H.  
26 (2016). 2016 update of the PRIDE database and its related tools. *Nucleic Acids Res*, 44(D1),  
27 D447-456. doi:10.1093/nar/gkv1145
- 28 Yao, Y., Tsuchiyama, S., Yang, C., Bulteau, A. L., He, C., Robison, B., . . . Schmidt, M. (2015).  
29 Proteasomes, Sir2, and Hxk2 form an interconnected aging network that impinges on the  
30 AMPK/Snf1-regulated transcriptional repressor Mig1. *PLoS Genet*, 11(1), e1004968.  
31 doi:10.1371/journal.pgen.1004968
- 32 Zhang, N., Quan, Z., Rash, B., & Oliver, S. G. (2013). Synergistic effects of TOR and proteasome  
33 pathways on the yeast transcriptome and cell growth. *Open Biol*, 3(5), 120137.  
34 doi:10.1098/rsob.120137
- 35 Zhang, P., Smith-Nguyen, E. V., Keshwani, M. M., Deal, M. S., Kornev, A. P., & Taylor, S. S. (2012).  
36 Structure and allostery of the PKA RIIbeta tetrameric holoenzyme. *Science*, 335(6069), 712-  
37 716. doi:10.1126/science.1213979
- 38 Zhu, K., Borrelli, K. W., Greenwood, J. R., Day, T., Abel, R., Farid, R. S., & Harder, E. (2014).  
39 Docking covalent inhibitors: a parameter free approach to pose prediction and scoring. *J Chem*  
40 *Inf Model*, 54(7), 1932-1940. doi:10.1021/ci500118s

41

42

43

## 1 **Materials and methods**

2 Detailed materials and methods can be found in Supplementary information.

## 3 **Strains and growth conditions**

4 Yeast strains and plasmids are listed in Supplementary Table S1. All the strains used in this study are  
5 derivatives of BY4741/BY4742. Strains were grown at 30°C in YPD 2% glucose (w/v) or in Yeast  
6 Nitrogen Base defined medium containing 2% glucose and complete supplement mixture (CSM)  
7 lacking the appropriate amino acids (Formedium) as described previously (Molin et al., 2011). Spot  
8 tests H<sub>2</sub>O<sub>2</sub> spot tests

## 9 **Global H<sub>2</sub>O<sub>2</sub> scavenging in the medium**

10 Medium peroxide determinations were performed using a ferrithiocyanate spectrophotometric assay  
11 (Molin et al., 2007).

## 12 **Isolation of old cells**

13 Old cells were obtained as previously described by sorting biotin-labeled mother cells using the  
14 MagnaBind streptavidin system (Sinclair and Guarente, 1997). After sorting the cells were imaged by  
15 microscopical analysis.

## 16 **Measurements of cytoplasmic H<sub>2</sub>O<sub>2</sub> using HyPer3**

17 Fluorescence of the ratiometric probe HyPer-3 (Bilan et al., 2013) was acquired using an Olympus  
18 IX81 motorized microscope with a PlanApoN 60x/1.42 Oil objective and a 12-bit Hamamatsu camera.  
19 For bolus addition of H<sub>2</sub>O<sub>2</sub>, cells in midexponential phase were incubated with 0.2 mM H<sub>2</sub>O<sub>2</sub> for 10  
20 min and immediately imaged. Image and signal analysis was performed using the MATLAB toolbox  
21 2016b. Cell segmentation is performed with the CellX algorithm using the bright-field channel.

## 22 **Lifespan Analyses**

23 Lifespan analyses were performed as previously described by counting the number of daughters  
24 produced in a cohort of mother cells (Erjavec et al., 2007).

## 25 **Quantitative Real-Time PCR Analysis**

26 Cell were lysed using Trizol Reagent (Invitrogen) upon cell homogenization with silica beads by Fast  
27 prep (6.5 m/s, 30 sec, interval 2.5min, 4 °C). RNA was extracted using phenol chloroform extraction,  
28 purified with Invitrogen PureLink RNA Mini Kit columns and converted to cDNA using the QIAGEN  
29 QuantiTect Reverse Transcription Kit. Q-PCR was performed using the BioRad iQ SYBR Green  
30 Supermix and quantified with the BioRad iCycler, iQ5. *ACT1* was used as a reference gene.

## 31 **2D-PAGE**

32 Protein synthesis rates of the indicated proteins were determined in <sup>35</sup>S-Methionine labelled protein  
33 extracts separated by two-dimensional polyacrylamide gel electrophoresis as described (Maillet et al.,  
34 1996; Molin et al., 2011).

## 35 **Measurement of Ras2-GTP *in vivo***

1 Ras2-GTP level were measured as a ratio between Ras2-GTP and total Ras2 as described previously  
2 (Colombo & Martegani, 2014; Peeters et al., 2017).

### 3 **cAMP measurement**

4 cAMP measurements were performed as previously described (Caballero et al., 2011; Parts et al.,  
5 2011).

### 6 **Spore viability**

7 The viability of spores segregating in the sporulation and dissection of a heterozygous diploid strains  
8 were analyzed after 4 days of incubation at 30°C by in tetrads where 1) all markers analyzed  
9 segregated 2:2, 2) the exact genotypes of all spores were possible to deduce from this information and  
10 3) the genotypes of dead spores were assigned based on markers present in the other spores dissected  
11 from the same tetrads.

### 12 **Immunoblot analysis**

13 Immunoblot analysis of selected proteins was performed as described previously (Biteau, Labarre, &  
14 Toledano, 2003; Molin et al., 2011). Prior to separation on 12% Bis-Tris NuPAGE gels using an XCell  
15 SureLock MiniCell (Invitrogen) in NuPAGE MOPS running buffer as recommended by the supplier  
16 protein extracts were heated in Laemlii buffer (pH 8.7) either in the presence of  $\beta$ -mercaptoethanol  
17 (5%, reducing) or not (non-reducing) as indicated.

18 Glutathionylation of Tpk1 was assayed using anti-glutathione immunoblot on Tpk1-HB  
19 immunoprecipitated by  $\text{Ni}^{2+}$ -Sephacrose beads following a protocol similar to that used during MS  
20 sample preparation (see below). We verified that the anti-glutathione immunoblot signal on  
21 immunoprecipitated Tpk1 completely disappeared upon extract reduction by  $\beta$ -mercaptoethanol.

### 22 **Mass spectrometric sample preparation**

23 Three independent experimental replicates were performed for each experimental condition. For HB  
24 (poly histidine, biotinylation signal) tandem affinity purifications were performed as described  
25 elsewhere (Reiter et al., 2012). Cleared extracts were incubated (4 hours, room temperature) with  $\text{Ni}^{2+}$ -  
26 Sepharose beads, washed with urea buffer and urea buffer pH 6.3. Proteins were eluted in urea buffer  
27 pH 4.3 containing 10mM EDTA, incubated overnight with streptavidin-agarose beads, washed using  
28 urea wash buffer containing 1% SDS and urea wash buffer without SDS. Beads were washed five  
29 times with 50 mM ammonium bicarbonate (ABC). Cys-residues were alkylated with IAA (25% w/w  
30 of the estimated amount of protein). Proteins were digested with trypsin at 37°C overnight. Digestion  
31 was stopped with trifluoroacetic acid (0.5% final concentration) and the peptides were desalted using  
32 C18 Stagetips (Rappsilber, Mann, & Ishihama, 2007).

### 33 **Mass spectrometry analysis of Tpk1**

34 Peptides were separated on an Ultimate 3000 RSLC nano-flow chromatography system (Thermo-  
35 Fisher), using a pre-column (Acclaim PepMap C<sub>18</sub>, 2 cm × 0.1 mm, 5  $\mu\text{m}$ , Thermo-Fisher), and a C<sub>18</sub>  
36 analytical column (Acclaim PepMap C18, 50 cm × 0.75 mm, 2  $\mu\text{m}$ , Thermo-Fisher). A Proxeon  
37 nanospray flex ion source (Thermo Fisher) using coated emitter tips (New Objective) was used for  
38 ionization. Peptides were analyzed on an Orbitrap Fusion Lumos Tribrid mass spectrometer (Thermo  
39 Fisher). MS proteomics data have been deposited to the ProteomeXchange Consortium through the

1 Proteomics Identifications database (PRIDE) partner repository (Vizcaino et al., 2016) with the data  
2 set identifiers PXD012617.

### 3 **Closed database search**

4 Peptide identification and label free quantification (LFQ) were performed using MaxQuant (version  
5 1.6.0.16) with default parameters. N-terminal acetylation, deamidation of asparagine and glutamine,  
6 oxidation of methionine, tri-oxidation and glutathionylation of cysteine and phosphorylation of serine,  
7 threonine and tyrosine were set as variable protein modification. Carbamidomethylation of cysteine  
8 was set as fixed. A maximum of 5 variable modifications per peptide was allowed. A maximum of 2  
9 missed cleavages per peptide was allowed. MaxLFQ (implemented in the MaxQuant package) was  
10 used for MS1-based label free quantification and normalization of protein groups.

### 11 **Open search analysis of selected peptides**

12 To screen for protein modifications in an unbiased manner we initially performed an open search  
13 using MSFragger in FragPipe (Kong, Leprevost, Avtonomov, Mellacheruvu, & Nesvizhskii, 2017).  
14 The default open search parameters were used, with trypsin specificity, +/- 500 Da windows and  
15 oxidation of methionine and carbamidomethylation of cysteine as variable modifications. The  
16 observed mass shifts were inspected and filtered for the most abundant and relevant modifications  
17 occurring in Tpk1.

### 18 **Targeted mass-spectrometry**

19 Parallel-Reaction-Monitoring (PRM) assays were generated based on the peptide information obtained  
20 by MaxQuant. We selected Tpk1 and Tsa1 peptides for targeted relative LFQ as specified in  
21 Supplementary Tables 4-6. Raw data were obtained on an Orbitrap Q Exactive HF-X (Thermo Fisher  
22 Scientific) mass spectrometer.

23 Data analysis, manual validation of all transitions (based on retention time, relative ion intensities, and  
24 mass accuracy), and relative quantification was performed in Skyline. Up to six characteristic  
25 transitions were selected for each peptide and their peak areas were summed for peptide quantification  
26 (total peak area). The mean of the log<sub>2</sub> Tpk1 non-modified peptide intensities was used to normalize  
27 Tpk1 modified peptides and Tsa1 peptides to account for differences in Tpk1 levels. Tsa1 peptide  
28 intensities (anti-log) were summed up to obtain values for relative protein abundance.

### 29 **mPEG assay**

30 To assay oxidation of the Tpk1 protein we used a modified mPEG-switch assay (Burgoyne et al.,  
31 2013).

### 32 **Quantitative analysis of Msn2 nuclear localization**

33 The degree of nuclear localization of Msn2 upon the addition of H<sub>2</sub>O<sub>2</sub> was analyzed in cells  
34 transformed with the pAMG plasmid on a Nikon TE2000E-PFS epi-fluorescence microscope at  
35 low light-intensity as described previously (Bodvard et al., 2017).

### 36 **Homology modeling**

37 A model of the yeast PKA tetramer structure was obtained by homology modeling. The protein  
38 sequences of yeast Tpk1 (catalytic subunit of PKA) and Bcy1 (regulatory subunit of PKA) were  
39 obtained from Genbank (ID: 1023942850 and ID: 1023943330, respectively). The crystal structure of

1 mouse PKA (PDBID: 3TNP) was used as the template for the homology calculations. The homology  
2 model was built using StructurePrediction panel (Jacobson, Friesner, Xiang, & Honig, 2002) in  
3 Schrödinger Suite (Schrödinger, LLC, New York, NY).

#### 4 **Covalent docking**

5 Covalent docking was carried out to obtain a model for glutathionylated Tpk1. The Tpk1 crystal  
6 structure [PDB ID: 1FOT, (Mashhoon, Carmel, Pflugrath, & Kuret, 2001)] were prepared using the  
7 Protein Preparation utility in Schrodinger to assign the correct protonation state and fix the missing  
8 side chains and loops. The glutathione was built by 3D builder and prepared by LigPre utility in  
9 Schrodinger. The Covalent-Dock panel (Zhu et al., 2014) in Schrodinger was used to predict the pose  
10 of the glutathione attaching to Cys243. The reaction type was set to be disulfide formation, the  
11 docking mode was set to be thorough pose prediction, the other parameters were all set to be default.  
12 At the final step, Prime Energy was used to rank the poses of the ligand.

#### 13 **Molecular dynamics simulations**

14 The GROMACS software (Abraham et al., 2015) was used for the Molecular dynamics simulations  
15 and the Amber 99 (Ponder & Case, 2003) force field was selected to assign the parameters for  
16 different amino acid residues. Glutathionylation and phosphorylation parameters were generated from  
17 Ambertools and incorporated into the GROMACS software.

18

19



## **Supplementary information**

### **Peroxiredoxin promotes longevity and H<sub>2</sub>O<sub>2</sub>-resistance in yeast through redox-modulation of PKA**

**Friederike Roger, Cecilia Picazo, Chikako Asami, Wolfgang Reiter, Sarah Hanzén, Chunxia Gao, Gilles Lagniel, Niek Welkenhuysen, Jean Labarre, Thomas Nyström, Morten Grøtli, Markus Hartl and Mikael Molin**

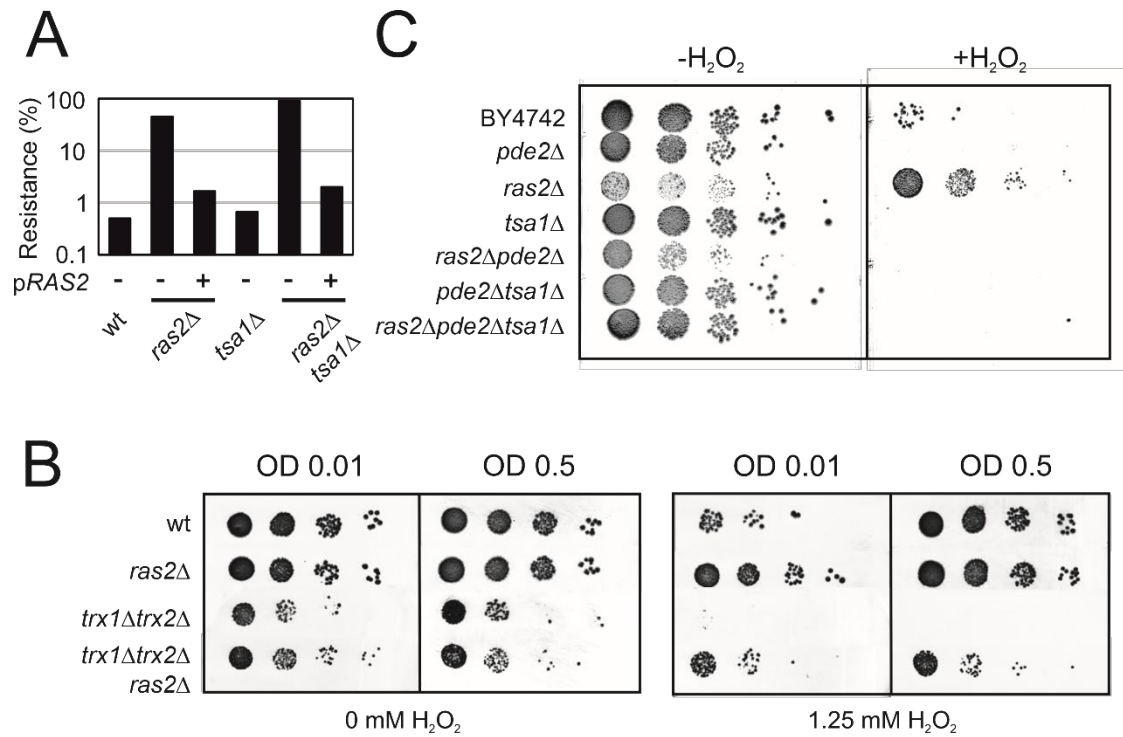

**Figure S1.** Related to Figure 2. Ras-deficiency counteracts the H<sub>2</sub>O<sub>2</sub> sensitivity of cells lacking Tsa1 or the cytosolic thioredoxins Trx1 and Trx2 in a manner independent on increased H<sub>2</sub>O<sub>2</sub> scavenging. **A)** H<sub>2</sub>O<sub>2</sub> resistance in the indicated mutant strains complemented with a centromeric *RAS2* plasmid (pMW1, +) or transformed with the vector control plasmid (-, yCPlac33). **B-C)** H<sub>2</sub>O<sub>2</sub> resistance in the indicated mutant strains strains grown to early (OD0.01) and mid exponential phase (OD0.5, **B**) or OD 0.3 (**C**) and spotted onto plates with or without the indicated amounts of H<sub>2</sub>O<sub>2</sub>.

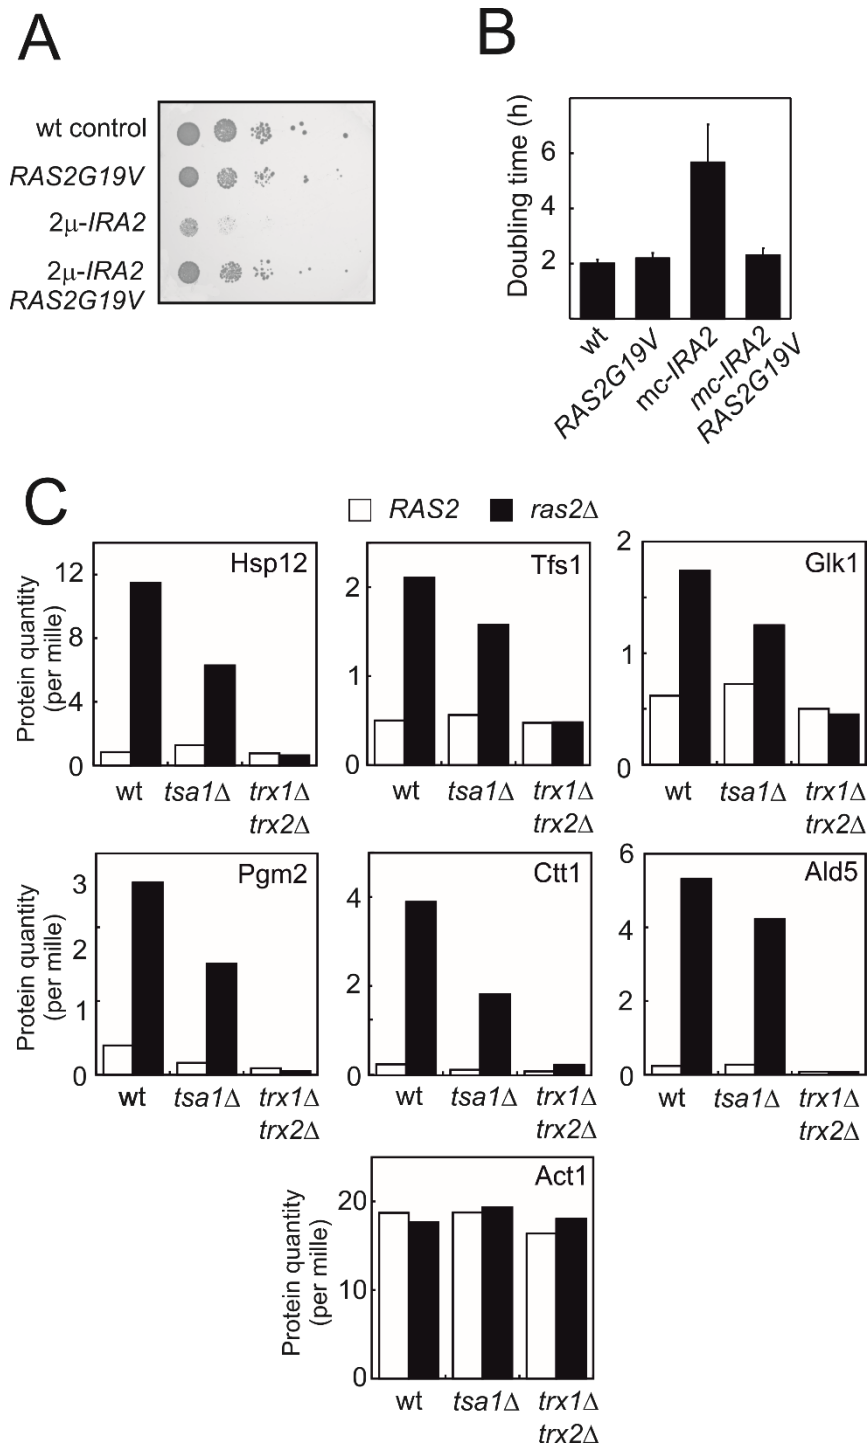

**Figure S2.** Related to Figure 3. Substantially reduced Ras activity slows down growth and activates Msn2 in a manner dependent on Tsa1 and the cytosolic thioredoxins. **A-B)** Growth of cells expressing the oncogenic *RAS2G19V* allele, overexpressing *IRA2* (mc-*IRA2*) or both. **C)** Expression of PKA repressed Msn2/4 targets (Hasan et al., 2002; Molin et al., 2011) in wild-type, *tsa1Δ* or *trx1Δ* *trx2Δ* cells deficient in *RAS2* (*ras2Δ*) or not (*RAS2*).



in the absence of stress ( $H_2O_2^-$ ) or following the addition of 0.4 mM  $H_2O_2$  for 20 min ( $H_2O_2^+$ ). NR = non-reducing R = reducing CS = *trx2C34S* SS = *trx2C31SC34S*. **D)** Tpk1 redox immunoblots of protein extracts isolated from the indicated *myc-tsa1* mutant strains in the absence of stress (Time in  $H_2O_2 = 0$ ) or 10 or 120 min following the addition of 0.4 mM  $H_2O_2$ . **E-F)** Mass-shifts in peptides covering the indicated Tpk1 cysteines detected using unbiased open search approaches. Tpk1-Cys195 denotes the F189-K204 peptide whereas Tpk1-Cys243 the Y239-K261 peptide. **G)** PRM-based quantification of the indicated C195 containing Tpk1 peptides (n=3). Error bars indicate SD. **H)** PRM-based quantification of the Thr241 phosphorylated and Cys243 sulfinic acid containing Y239-K261 peptide in Tpk1 (n=3). Error bars indicate SD. **I)** mPEG assay of the oxidation of Tpk1 following the addition of the indicated amount of  $H_2O_2$  for 10 min in a *tpk1Δtpk2Δtpk3Δptpk1C243A* mutant strain. Cells were treated with  $H_2O_2$ , lysed by TCA and reduced cysteines alkylated by NEM. Following reduction by DTT, oxidized cysteines were alkylated by mPEG in half of the extract (mPEG) and to the other half NEM was added as a control (NEM). Arrows indicate Tpk1 (black) and Tpk1-mPEG (red).



## **Detailed materials and methods**

### **Strains and growth conditions**

Yeast strains and plasmids are listed in Supplementary Table S1. The strains used in this study are derivatives of BY4741/BY4742. Strains were grown at 30°C in YPD 2% glucose (w/v) or in Yeast Nitrogen Base defined medium containing 2% glucose and complete supplement mixture (CSM) lacking the appropriate amino acids (Formedium) as described previously (Molin et al., 2011). To check the segregation of deletion markers in tetrad dissections YPD medium supplied with the following chemicals was used to check segregation of the dominant markers: *kanMX4* (G418 200 µg/ml), *natMX4* (ClonNAT 100 µg/ml), *hphMX4* (Hygromycin B 300 µg/ml), *bleMX4* (Phleomycin 40 µg/ml). To counterselect the p*TPK1-URA3* plasmid cells were grown in defined glucose CSM – HIS, 5-FOA medium containing YNB, glucose and CSM –URA, HIS; 50 mg/l uracil and 1 g/l 5-fluoroorotic acid.

### **Strain and plasmid constructions**

Strains YMM170 (*ras2Δtsa1Δ*) and YMM172 (*pde2Δtsa1Δ*) were constructed by crossing strain YMM114 to BY4741 *ras2Δ::kanMX4* and BY4741 *pde2Δ::kanMX4* [Research Genetics, (Giaever et al., 2002)], respectively, and selecting for Mat alpha, methionine prototrophic, lysine auxotrophic, G418 resistant and nourseothricin resistant progeny. Strains YMM171 and YMM173 were constructed by crossing a BY4741 *pde2Δ::hphMX4* {*pde2Δ::kanMX4* from the deletion collection [Research Genetics, (Giaever et al., 2002)] marker-switched (Goldstein & McCusker, 1999) to *pde2Δ::hphMX4* to strain YMM170 (*ras2Δtsa1Δ*) and selecting for Mat alpha, methionine prototrophic, lysine auxotrophic, G418 resistant, hygromycin resistant and nourseothricin sensitive (YMM171 *ras2Δpde2Δ*) or nourseothricin resistant (YMM173 *ras2Δpde2Δtsa1Δ*) progeny. Strains YMM174 (*msn2Δmsn4Δ*), YMM175 (*pde2Δ*) and YMM176 (*pde2Δ o/e TSA1*) were constructed by crossing BY4741 *msn2Δmsn4Δ* (Caballero et al., 2011) or BY4741 *pde2Δ::kanMX4* [Research Genetics, (Giaever et al., 2002)] to strains YMM130 or BY4742 *his3ΔI::pRS403-Myc-TSA1*, respectively and selecting for Mat alpha, methionine prototrophic, lysine auxotrophic, histidine auxotrophic, hygromycin- and nourseothricin-resistant progeny (YMM174) or Mat alpha, methionine prototrophic, lysine auxotrophic, G418 resistant and histidine prototrophic progeny (YMM174 and YMM175). Strain YMM177 was constructed by marker-switching (Goldstein & McCusker, 1999) a Mat a *ras1Δ::kanMX4* spore, obtained from crossing strain BY4741 *ras1Δ::kanMX4* [Research Genetics, (Giaever et al., 2002)] to strain YMM114 and selecting for Mat a, methionine prototrophic, lysine auxotrophic and G418 resistant progeny, to *ras1Δ::hphMX4*. Strain YMM178 (*tpk1Δ/TPK1 tpk2Δ/TPK2 tpk3Δ/TPK3*) was constructed by crossing a BY4742 *tpk1Δ::kanMX4 tpk2Δ::natMX4* strain to a BY4741 *tpk3Δ::hphMX4* strain {*tpk3Δ::kanMX4* from the deletion collection [Research Genetics, (Giaever et al., 2002)] marker-switched (Goldstein and McCusker, 1999) to *tpk3Δ::hphMX4* resulting in a *tpk1Δ/TPK1 tpk2Δ/TPK2 tpk3Δ/TPK3* heterozygous diploid strain. A Mat alpha, nourseothricin- and hygromycin-resistant spore constitutes strain YMM179. The BY4742 *tpk1Δ::kanMX4 tpk2Δ::natMX4* strain was constructed by introducing *tpk2Δ::natMX4* PCR amplified from a BY4742 *tpk2Δ::natMX4* strain (Costanzo et al., 2010) into strain BY4741 *tpk1Δ::kanMX4* [Research Genetics, (Giaever et al., 2002)] selecting for nourseothricin- and G418-resistance and verifying the deletion by diagnostic PCR. A BY4742 *tpk1Δtpk2Δtpk3Δ* p*TPK1-URA3* haploid strain (YMM180) was constructed by transforming strain YMM177 with plasmid p*TPK1-URA3* and sporulating the strain selecting for a Mat alpha methionine prototrophic, lysine auxotrophic, G418-, nourseothricin-, hygromycin B-resistant and uracil auxotrophic progeny. Strains YMM181-YMM185 were constructed by transforming strain YMM179 with plasmids pRS313 (YMM181), pRS313-*TPK1*

(YMM182), pRS313-*tpk1C243A* (YMM183) and pRS313-*tpk1C243D* (YMM184) and pRS313-*tpk1T241A* (YMM185). Counterselecting p*TPK1-URA3* on 5-FOA medium resulted in strains YMM186 (BY4742 *tpk1Δtpk2Δtpk3Δ* pRS313-*TPK1*), YMM187 (BY4742 *tpk1Δtpk2Δtpk3Δ* pRS313-*tpk1C243A*), YMM188 (BY4742 *tpk1Δtpk2Δtpk3Δ* pRS313-*tpk1C243D*) and yMM189 (BY4742 *tpk1Δtpk2Δtpk3Δ* pRS313-*tpk1T241A*), respectively. Strain YMM190 (*ras2Δtrx1Δtrx2Δ*) was constructed by crossing strain YMM113 (*ras2Δ*) to strain YMM143 (*trx1Δtrx2Δ*) selecting for Mat alpha, methionine prototrophic, lysine auxotrophic, G418-, nourseothricin- and hygromycin B-resistant progeny. Strain YMM191 was constructed by marker-switching strain BY4741 *tsa1Δ::kanMX4* [Research Genetics, (Giaever et al., 2002)] into BY4741 *tsa1Δ::bleMX4* using a bleMX4 cassette PCR amplified from plasmid pUG66 (Gueldener, Heinisch, Koehler, Voss, & Hegemann, 2002) using primers PR78 and PR79 (Goldstein & McCusker, 1999). Strain yMM192 was constructed by crossing strains yMM179 and yMM191 selecting for a Mat a, nourseothricin+, hygromycin+ and phleomycin+ spore. Strain WR1832 was constructed by first introducing PCR amplified *trp1A::kanMX4* DNA (Longtine et al., 1998) into strain YMM179, verification of cassette integration by PCR and loss of the ability to grow without tryptophan supplement and next by *HBH::TRP1* C-terminal tagging of *TPK1* and PCR based verification as described (Tagwerker et al., 2006). Strains yCP101-yCP104 were constructed by crossing Mat a *his3ΔI::pRS403* or *his3ΔI::pRS403-myc-TSA1* spores, obtained in crosses generating strains yMM175 above, either to strain yMM182 or to strain yMM186 also carrying plasmid *pRS316-tpk1C243A*. Methionine prototrophic, lysine auxotrophic, histidine prototrophic, 5-FOA-sensitive, G418+, nourseothricin+ and hygromycin B+ progeny obtained in these crosses constitute strains yCP101-yCP104 listed in Table S1. Strains yCP105 and yCP106 were constructed by crossing strains yMM186 (p*TPK1*) or yMM189 (p*tpk1T241A*), respectively, to strain yMM192 selecting for Mat alpha, Met+, Lys-, G418+, Nat+, Hyg+, Phleomycin+, His+ progeny. Strain yCP107 was constructed by crossing strain WR1832 to yMM192 and selecting for Mat alpha, Met+, Lys-, G418+, Nat+, Hyg+, Phleomycin+, Trp+ progeny.

Plasmids pRS313-*tpk1C243A*, pRS313-*tpk1C243D*, pRS313-*tpk1T241A* and pRS316-*tpk1C243A*, were constructed by site directed mutagenesis of the pRS313-*TPK1* or pRS316-*TPK1* plasmids (Eurofins Genomics). Plasmids pRS315-*trx1C34S*-ProtA and pRS315-*trx2C31SC34S*-ProtA were constructed by site-directed mutagenesis of plasmid pRS315-*TRX2*-ProtA (GenScript). The correct sequence of all plasmids constructed was verified by sequencing.

### Global H<sub>2</sub>O<sub>2</sub> scavenging in the medium

Medium peroxide determinations were performed using a ferrithiocyanate spectrophotometric assay (Molin et al., 2007). After bolus addition of H<sub>2</sub>O<sub>2</sub>, 100 μL sample aliquots were withdrawn and cultures were arrested by the addition of 1 ml ice-cold 10% TCA. After pelleting cells 180 mM KSCN and 1.4 mM Fe(NH<sub>4</sub>)<sub>2</sub>(SO<sub>4</sub>)<sub>2</sub> final concentrations were added to the supernatants. Absorbance at 480 nm was subsequently determined and compared to equally TCA-treated H<sub>2</sub>O<sub>2</sub> standards diluted in medium.

### Isolation of old cells

Old cells were obtained as previously described by sorting biotin-labeled mother cells using the MagnaBind streptavidin system (Sinclair and Guarente, 1997). Briefly, mid-exponential phase cells were labeled with EZ-Link Sulfo-NHS-LC Biotin and grown overnight in minimal media (CSM-His). The cells were incubated with streptavidin-conjugated magnetic beads for 2 h and then sorted magnetically with the unlabeled cells being washed away. Sorted cells were then grown overnight and



the streptavidin labeling procedure was repeated before sorting one last time. After sorting the cells were incubated for 1 h in CSM-His media at 30 °C for recovery before microscopy.

### **Measurements of cytoplasmic H<sub>2</sub>O<sub>2</sub> using HyPer3**

Fluorescence of the ratiometric probe HyPer-3 (Bilan et al., 2013) was acquired using an Olympus IX81 motorized microscope with a PlanApoN 60x/1.42 Oil objective and a 12-bit Hamamatsu camera. Shifts in the fluorescence intensities were acquired with excitation around 500 nm (485/20 nm) and 420 nm (427/10 nm filter) and an emission filter around 520 nm (Fura 2 filter). For bolus addition of H<sub>2</sub>O<sub>2</sub>, cells in midexponential phase were incubated with 0.2 mM H<sub>2</sub>O<sub>2</sub> for 10 min and immediately imaged.

### **Image Analysis**

Image and signal analysis was performed using the MATLAB toolbox 2016b. Cell segmentation is performed with the CellX algorithm using the bright-field channel. The fluorescent intensity data was obtained from fluorescent images and data is presented as the median 500 nm fluorescent signal normalized to the median fluorescent 420 nm signal by dividing the latter with the former.

### **Lifespan Analyses**

Lifespan analyses were performed as previously described by counting the number of daughters produced in a cohort of mother cells (Erjavec et al., 2007).

### **Spot tests**

H<sub>2</sub>O<sub>2</sub> resistance was tested with mid-exponential-phase ( $A_{600}=0.5$ ,  $5 \times 10^6$  cells/ml) cells that were diluted (x5, x50, x500, x5000, x50000) and spotted onto SD media containing 0 to 1 mM H<sub>2</sub>O<sub>2</sub> or YPD media containing 0 to 2 mM. The plates were incubated at 30 °C for 3 days. For glycogen accumulation, plates incubated for 2 days at 30 °C were exposed to iodine-bead fumes for 2.5 min and scanned immediately.

### **Quantitative Real-Time PCR Analysis**

Cell cultures were harvested in mid-exponential phase and resuspended in 1 ml Trizol Reagent (Invitrogen) and homogenized with silica beads by Fast prep (6.5 m/s, 30 sec, interval 2.5min, 4 °C). RNA was extracted using phenol chloroform extraction and precipitated with sodium acetate/ethanol. The pellet was treated with DNase for 30min followed by heat-inactivation of the enzyme. The RNA was purified with Invitrogen PureLink RNA Mini Kit columns and converted to cDNA following the QIAGEN QuantiTect Reverse Transcription Kit. Q-PCR was performed with 50ng cDNA by using BioRad iQ SYBR Green Supermix and quantified with the BioRad iCycler, iQ5. Relative levels of mRNA were calculated by using cycle times of *ACT1* as a reference gene.

### **2D-PAGE**

Protein synthesis rates of the indicated proteins were determined in <sup>35</sup>S-Methionine labelled protein extracts separated by two-dimensional polyacrylamide gel electrophoresis as described (Maillet et al., 1996; Molin et al., 2011). Tsa1 sulfinylation was determined by comparing levels of sulfinylated Tsa1 (Tsa1-SOOH) to non-sulfinylated Tsa1 on silver-stained 2D gels as described (Molin et al., 2011).

### **Measurement of Ras2-GTP *in vivo***

Ras2-GTP level were measured as a ratio between Ras2-GTP and total Ras2 as described previously (Colombo & Martegani, 2014; Peeters et al., 2017). Mid-exponential phase yeast cells were harvested and lysed with glass- beads in Fast-prep (6.0 m/s, 20sec, interval 2.5 min) in lysis buffer [50 mM Tris-HCl, 200 mM NaCl, 2.5 mM MgCl<sub>2</sub>, 10% glycerol, 1% Triton X100, cOmplete Protease inhibitor EDTA-free]. The supernatant with 1.5mg of total protein was incubated with a bed volume 50  $\mu$ L of glutathione S-transferase (GST)-RBD fusion protein pre-bound to glutathione-Sepharose for 1 h at 4 °C and washed three times with lysis buffer by centrifugation. For elution the beads were boiled for 5 min at 98 °C in SDS-sample buffer (6% SDS, 62.5 mM Tris-HCl pH 8.7, 30% Glycerol, 0.75%  $\beta$ -mercaptoethanol). Through western blotting, Ras2-GTP and total Ras2 proteins were detected with anti-Ras2 antibodies. Determination of ratios between Ras2-GTP and total Ras2 was performed by ImageJ.

### cAMP measurement

cAMP measurements were performed as previously described (Caballero et al., 2011; Parts et al., 2011).  $2 \times 10^8$  cells grown to midexponential phase were pelleted, washed, and resuspended in 1 ml cold milliQ water. Metabolites were extracted by adding 1.2 ml TCA (0.5 M) and occasional vigorous vortexing while samples were kept on ice for 15 min. TCA was removed by ether extraction. cAMP levels were determined by the LANCE cAMP 384 kit in 40  $\mu$ L total reactions and by comparing to the standards supplied. The values for cAMP were normalized to the wild type level.

### Spore viability

The viability of spores segregating in the sporulation and dissection of a heterozygous diploid *ras1 $\Delta$ ::hphMX4/RAS1 ras2 $\Delta$ ::kanMX4/RAS2 tsa1 $\Delta$ ::natMX4/TSA1* strain obtained by crossing strain YMM176 (*ras1 $\Delta$ ::hphMX4*) to strain YMM170 (BY4742 *ras2 $\Delta$ ::kanMX4 tsa1 $\Delta$ ::natMX4*) was analyzed after 4 days of incubation at 30°C in 32 tetrads where 1) all markers analyzed (*hphMX4*, *kanMX4*, *natMX4*, *MET15*, *LYS2*) segregated 2:2, 2) the exact genotypes of all spores were possible to deduce from this information and 3) the genotypes of dead spores were assigned based on markers present in the other spores dissected from the same tetrads. Similarly, spore viability of spores segregating in a heterozygous diploid *tpk1 $\Delta$ ::kanMX4/TPK1 tpk2 $\Delta$ ::natMX4/TPK2 tpk3 $\Delta$ ::hphMX4/TPK3 tsa1 $\Delta$ ::bleMX4/TSA1*, obtained by crossing strain YMM191 (BY4741 *tsa1 $\Delta$ ::bleMX4*) to strain YMM186 (BY4742 *tpk1 $\Delta$ ::kanMX4 tpk2 $\Delta$ ::natMX4 tpk3 $\Delta$ ::hphMX4* expressing pRS313-*TPK1*), was analyzed in 43 tetrads where all chromosomal markers analyzed (*kanMX4*, *natMX4*, *hphMX4*, *bleMX4*, *MET15*, *LYS2*) segregated 2:2. The ability to grow in the absence of histidine supplementation (-HIS) was taken as an indication that the pRS313-*TPK1* plasmid was present.

### Immunoblot analysis

Immunoblot analysis of selected proteins was performed as described previously (Biteau, Labarre, & Toledano, 2003; Molin et al., 2011). Prior to separation on 12% Bis-Tris NuPAGE gels using an XCell SureLock MiniCell (Invitrogen) in NuPAGE MOPS running buffer as recommended by the supplier protein extracts were heated in Laemmli buffer (pH 8.7) either in the presence of  $\beta$ -mercaptoethanol (5%, reducing) or not (non-reducing) as indicated. Transfer to Immobilon-FL PVDF membranes was done using an XCell II Blot Module kit. Membranes were analyzed by the Odyssey infrared imaging system (LI-COR biosciences) as recommended by the suppliers.

Glutathionylation of Tpk1 was assayed using anti-glutathione immunoblot on Tpk1-HB immunoprecipitated by Ni<sup>2+</sup>-Sepharose beads following a simplified protocol similar to that used

during MS sample preparation (see below). We verified that the anti-glutathione immunoblot signal in Tpk1 completely disappeared upon extract reduction by  $\beta$ -mercaptoethanol.

### **Growth conditions for MS analysis**

Cells were grown at 30°C in yeast extract/peptone (YP) medium, containing 2% glucose as carbon source. Three independent experimental replicates were performed for each experimental condition. For each replicate, we inoculated 750ml YPD cultures, which were incubated (with shaking) overnight until OD600 = 1. Oxidative stress was induced by adding 0.4 mM or 0.8 mM (final concentration) H<sub>2</sub>O<sub>2</sub> for 10 minutes.

### **Mass spectrometric sample preparation**

HB (poly histidine, biotinylation signal) tandem affinity purifications were performed as described elsewhere (Reiter et al., 2012). Cells were harvested by filtration and immediately deep-frozen in liquid N<sub>2</sub>. Cells were grinded using a SPEX Freezer Mill 6870 (SPEX SamplePrep, Metuchen, NJ, USA) with the following settings: 7 cycles: 3 min breakage (15 CPS), 3 min cooling, resuspended in buffer 1 (6 M guanidine HCl, 50 mM Tris pH8.0, 5 mM NaF, 1 mM PMSF, 0.1% Tween, cOmplete Protease inhibitor cocktail, pH 8) and cleared of debris by centrifugation 13.500 x g, 15 min, 4°C. Cleared extracts were incubated (4 hours, room temperature) with Ni<sup>2+</sup>-Sepharose beads, washed with urea buffer (8M urea, 50mM sodium phosphate buffer pH8.0, 300mM NaCl, 0.1% Tween20) and urea buffer pH 6.3. Proteins were eluted in urea buffer pH 4.3 containing 10mM EDTA, incubated overnight with streptavidin-agarose beads, washed using urea wash buffer containing 1% SDS and urea wash buffer without SDS. Beads were washed five times with 50 mM ammonium bicarbonate (ABC). Cys-residues were alkylated with IAA (25% w/w of the estimated amount of protein). Excess IAA was washed out by ABC. Proteins were digested with 300 ng trypsin at 37°C overnight. Digestion was stopped with trifluoroacetic acid (0.5% final concentration) and the peptides were desalted using C18 Stagetips (Rappsilber, Mann, & Ishihama, 2007). 50 fmol of the Peptide Retention Time Calibration Mixture was spiked in each sample for quality control.

### **Mass spectrometry analysis of Tpk1**

Peptides were separated on an Ultimate 3000 RSLC nano-flow chromatography system (Thermo-Fisher), using a pre-column (Acclaim PepMap C<sub>18</sub>, 2 cm × 0.1 mm, 5  $\mu$ m, Thermo-Fisher), and a C<sub>18</sub> analytical column (Acclaim PepMap C<sub>18</sub>, 50 cm × 0.75 mm, 2  $\mu$ m, Thermo-Fisher). A segmented linear gradient from 2% to 35% solvent B (solvent B: 80% acetonitrile, 0.1% formic acid; solvent A: 0.1% formic acid) was applied at a flow rate of 230 nL/min over 120 min. A Proxeon nanospray flex ion source (Thermo Fisher) using coated emitter tips (New Objective) was used for ionization. The capillary temperature was set to 200°C. Peptides were analyzed on an Orbitrap Fusion Lumos Tribrid mass spectrometer (Thermo Fisher). The mass spectrometer was operated in data-dependent mode, survey scans were obtained in a mass range of 380-1500 m/z with lock mass activated, at a resolution of 120,000 at 200 m/z and an automatic gain control (AGC) target value of 4E5. The maximum cycle time was set to 2.5 s and the most abundant precursors were selected for fragmentation by high-energy collision at 30% collision energy. Fragmented precursors were excluded from further fragmentation for 30s (with +/- 5 ppm accuracy) and peptides with charge +1 or > +6 were excluded from MS/MS analysis. The most abundant Tpk1 Cys containing peptide forms have been added to an inclusion list as specified in the raw files. MS proteomics data have been deposited to the ProteomeXchange Consortium through the Proteomics Identifications database (PRIDE) partner repository (Vizcaino et al., 2016) with the data set identifiers PXD012617.

## Closed database search

Peptide identification and label free quantification (LFQ) were performed using MaxQuant (version 1.6.0.16) with default parameters. *Saccharomyces cerevisiae* reference proteome database (UniProt, version January 2017) in combination with a common laboratory contaminants database (MQ) was used for peptide spectrum matching. N-terminal acetylation, deamidation of asparagine and glutamine, oxidation of methionine, tri-oxidation and glutathionylation of cysteine and phosphorylation of serine, threonine and tyrosine were set as variable protein modification. Carbamidomethylation of cysteine was set as fixed. A maximum of 5 variable modifications per peptide was allowed. Leucine and isoleucine were treated as indistinguishable. Enzyme specificity was set to “Trypsin/P”. A maximum of 2 missed cleavages per peptide was allowed. ‘Requantify’ and “Match between runs” was activated. MaxLFQ (implemented in the MaxQuant package) was used for MS1-based label free quantification and normalization of protein groups.

## Open search analysis of selected peptides

To screen for protein modifications in an unbiased manner we initially performed an open search using MSFragger in FragPipe (Kong, Leprevost, Avtonomov, Mellacheruvu, & Nesvizhskii, 2017). The default open search parameters were used, with trypsin specificity, +/- 500 Da windows and oxidation of methionine and carbamidomethylation of cysteine as variable modifications. The observed mass shifts were inspected and filtered for the most abundant and relevant modifications occurring in Tpk1.

## Targeted mass-spectrometry

Parallel-Reaction-Monitoring (PRM) assays were generated based on the peptide information obtained by MaxQuant. We selected Tpk1 and Tsa1 peptides for targeted relative LFQ as specified in Expanded View tables XY, datasheets 4 to 6. Peptides were separated using a 120 min gradient (HPLC setup as described above). PRM data acquisition was performed using a scheduled method with 20 min windows for each target based on the retention time determined in the shotgun-approach. Raw data were obtained on an Orbitrap Q Exactive HF-X (Thermo Fisher Scientific) mass spectrometer applying the following settings: survey scan with 60k resolution, AGC 1E6, 60 ms IT, over a range of 400 to 1400 m/z, PRM scan with 30 k resolution, AGC 1E5, 200 ms IT, isolation window of 1.0 m/z with 0.3 m/z offset, and NCE of 27%.

Wash runs were checked for potential peptide carry-over in between samples using same HPLC and MS methods. Data analysis, manual validation of all transitions (based on retention time, relative ion intensities, and mass accuracy), and relative quantification was performed in Skyline. Up to six characteristic transitions were selected for each peptide and their peak areas were summed for peptide quantification (total peak area). MS1 signals of PRTC standards were used as global standards for normalization in Skyline to account for fluctuations in instrument performance. The mean of the log<sub>2</sub> Tpk1 non-modified peptide intensities was used to normalize Tpk1 modified peptides and Tsa1 peptides to account for differences in Tpk1 levels. Tsa1 peptide intensities (anti-log) were summed up to obtain values for relative protein abundance.

## mPEG assay

To assay oxidation of the Tpk1 protein the immunoblot procedure was adapted to the mPEG-switch assay (Burgoyne et al., 2013) in the following way. Following TCA lysis, protein extraction and acetone wash dried protein was re-dissolved in buffer A (1% SDS, 10 mM EDTA, 0.1 M Tris pH 8.8),

containing 50 mM NEM to alkylate reduced cysteines. Proteins were next precipitated with TCA, washed with acetone, protein pellets dried and re-dissolved in buffer A containing 5 mM DTT to reduce oxidized cysteines. Following an additional round of TCA precipitation, acetone wash and lyophilization the dry protein pellets were subsequently dissolved in buffer B (1% SDS, 10 mM EDTA, 0.1 M Tris pH 8.0) containing either 1) 2 mM methoxypolyethylene glycol maleimide (mPEG) or 2) 50 mM NEM. Extracts were next subjected to SDS-PAGE (10% Criterion TGX Gels) gel electrophoresis under reducing conditions using a Criterion cell. Proteins were blotted to membranes using a Criterion Blotter and analyzed as above.

### **Homology modeling**

A model of the yeast PKA tetramer structure was obtained by homology modeling. The protein sequences of yeast Tpk1 (catalytic subunit of PKA) and Bcy1 (regulatory subunit of PKA) were obtained from Genbank (ID: 1023942850 and ID: 1023943330, respectively). The crystal structure of mouse PKA (PDBID: 3TNP) was used as the template for the homology calculations. The catalytic and regulatory subunits of yeast PKA and mouse PKA shares 48% and 42% sequence similarity, respectively. The homology model was built using StructurePrediction panel (Jacobson, Friesner, Xiang, & Honig, 2002) in Schrödinger Suite (Schrödinger, LLC, New York, NY). The ClustalW method was used to align the target and template sequences in Prime, the energy-based was selected for model building method, and homo-multimer was selected for multi-template model type.

### **Covalent docking**

Covalent docking was carried out to obtain a model for glutathionylated Tpk1. The Tpk1 crystal structure [PDB ID: 1FOT, (Mashhoon, Carmel, Pflugrath, & Kuret, 2001)] were prepared using the Protein Preparation utility in Schrodinger to assign the correct protonation state and fix the missing side chains and loops. The glutathione was built by 3D builder and prepared by LigPre utility in Schrodinger. The Covalent-Dock panel (Zhu et al., 2014) in Schrodinger was used to predict the pose of the glutathione attaching to Cys243. The reaction type was set to be disulfide formation, the docking mode was set to be thorough pose prediction, the other parameters were all set to be default. At the final step, Prime Energy was used to rank the poses of the ligand. Covalent docking was performed on dephosphorylated Tpk1 structure.

### **Molecular dynamics simulations**

Molecular dynamics simulations were carried out to study structural changes of Tpk1 upon phosphorylation and glutathionylation. MD simulations non-modified Tpk1, Cys243 glutathionylation Tpk1, Thr241 phosphorylation Tpk1, Cys243 glutathionylation and Tpk1 phosphorylation co-existed Tpk1 were carried out. The GROMACS software (Abraham et al., 2015) was used for the MD simulations and the Amber 99 (Ponder & Case, 2003) force field was selected to assign the parameters for different amino acid residues. The glutathionylation and phosphorylation parameters was generated from Ambertools, and incorporated into the GROMACS software.

The systems were solvated with a buffer distance of 10.0 Å TIP3P water in periodic boxes, and then 0.1 mol/L of Na<sup>+</sup> and Cl<sup>-</sup> ions were added to adjust the systems to electroneutrality condition. Then 200 steps of the steepest descent energy minimization was carried out to remove close contacts in the obtained systems. A 2ns position-restrained simulation with a constant pressure ensemble (NPT) was performed to make sure the water molecules would reach more favorable positions. The parameters for position-restrained simulation are set to be: a time step = 1 fs, temperature = 298 K, and coupling pressure = 1 bar, Coulomb cutoff = 10 Å, Lennard-Jones cutoff = 10 Å, particle-mesh Ewald

summation (Darden, York, & Pedersen, 1993; Essmann et al., 1995) was used for longrange electrostatics. The temperature and pressure was controlled by Berendsen coupling algorithm (Berendsen, Postma, Vangunsteren, Dinola, & Haak, 1984), with the time constants of 0.1 ps for temperature and 1.0 ps for pressure coupling. All bond lengths was constrained by the LINCS algorithm (Hess, Bekker, Berendsen, & Fraaije, 1997). Following the position-restrained simulation, 100 ns production simulations with NPT ensemble were performed on each system for further study the protein conformational changes. In this step, the Nose-Hoover thermostat (Hoover, 1985), with a time constant 0.1 ps, was used to control the temperature and the Parrinello-Rahman barostat (Parrinello & Rahman, 1981), with a time constant 1.0 ps, was used to control the pressure. The other parameters were the same as those in the position-restrained simulations.

### Quantification and statistical analysis

All experiments were repeated at least three times (biological replicates) to ensure reproducibility. Details on the number of replicates and statistical analyses performed are available below.

**Figure 1. A)** Lifespans were tested for statistical significance by the Mann-Whitney U test ([www.socscistatistics.com/tests/mannwhitney/Default2.aspx](http://www.socscistatistics.com/tests/mannwhitney/Default2.aspx)). Lifespans of the wt (n=168) vs the *tsalΔ* mutant (n=293), wt vs *tsalC48S* (n=70), wt vs *tsalC171S* (n=120), *tsalΔYF* (n=255) vs *tsalΔYFC171S* (n=70) are all different at  $p < 0.00001$ . The lifespan of the *tsalΔYF* mutant is different from the wt at  $p < 0.00854$  whereas no significant difference was seen between the *tsalΔ* vs *tsalC48S* ( $p = 0.1074$ ), *tsalC48S* vs *tsalC171S* ( $p = 0.3125$ ), *tsalΔYFC171S* vs *tsalC171S* ( $p = 0.23014$ ). **B)** The scavenging rates of the wt and the *tsalΔ* mutant following the addition of 0.4 mM are not significant in a two-tailed t-test assuming equal variance ( $p = 0.684$ ). **C)** Fluorescence ratios 500/420 nm of the HyPer3 expressing strains are significantly different between the wt young (n=231) vs old (n=319) ( $p = 2.42 \times 10^{-13}$ ) and wt young vs wt young +H<sub>2</sub>O<sub>2</sub> (n=202) ( $p = 5.27 \times 10^{-76}$ ) but not when comparing wt old vs *tsalΔ* old (n=236) ( $p = 0.101$ ). **D)** Fluorescence ratios 500/420 nm of the HyPer3 expressing strains are neither significantly different between the wt young (n=404) vs the o/e *TSAl* young (n=579,  $p = 0.069$ ) nor the wt old (n=190) vs o/e *TSAl* old (n=204,  $p = 0.755$ ).

**Figure 2. B)** Lifespans of the wt (n=157) vs the *tsalΔ* (n=293) and the *tsalΔ* vs *ras2ΔtsalΔ* (n=283) are significantly different at  $p < 0.00001$ . The lifespan of the *ras2Δ* (n=138) is not significantly different from the *ras2ΔtsalΔ* ( $p = 0.276$ ). **D)** H<sub>2</sub>O<sub>2</sub> resistance is significantly different between wt and *ras2Δ* strains ( $p = 0.013$ ), wt and *tsalΔ* ( $p = 0.0049$ ) and *tsalΔ* and *ras2ΔtsalΔ* ( $p = 0.010$ ). **E)** Lifespans of the wt (n=157) vs the *pde2Δ* (n=120), the *ras2ΔtsalΔ* vs *ras2Δpde2ΔtsalΔ* (n=164) and the *tsalΔ* (n=293) vs *pde2ΔtsalΔ* (n=242) are significantly different at  $p < 0.00001$ . Lifespans of the *ras2Δpde2Δ* (n=124) vs *pde2Δ* are significantly different ( $p = 0.00068$ ) whereas the lifespans of *pde2Δ* vs *pde2ΔtsalΔ* are not significantly different ( $p = 0.757$ ). **F)** H<sub>2</sub>O<sub>2</sub> resistance is significantly different between wt vector and mc-*IRA2* strains ( $p = 0.045$ ), *tsalΔ* vector and mc-*IRA2* strains ( $p = 0.0064$ ), *tsalΔ* mc-*IRA2* and *pde2ΔtsalΔ* mc-*IRA2* strains ( $p = 0.0065$ ) but not *pde2Δ* vector and mc-*IRA2* strains ( $p = 0.40$ ).

**Figure 3. A)** Doubling times of wt and *ras2Δ* strains are significantly different at  $p = 0.047$  whereas the difference between the *tsalΔ* and the *ras2ΔtsalΔ* is not statistically significant using a two-sided t-test assuming equal variance ( $p = 0.77$ ). **C)** Doubling times of control and mc-*IRA2* strains are significantly different for the wt (n=7 each,  $p = 7.4 \times 10^{-6}$ ), the *tsalΔYF* (n=3 and 4, respectively,  $p = 0.0032$ ) and *msn2Δmsn4Δ* (n=3 each,  $p = 0.026$ ). In none of the other strains are control and mc-*IRA2* different (*tsalΔ* n=3 each,  $p = 0.87$ ; *tsalC48S*, n=3 each,  $p = 0.71$ ; *tsalC171S*, n=4 each,  $p = 0.11$ ; *tsalΔYFC171S*, n=4 each,  $p = 0.77$ ; *pde2Δ*, n=3 each,  $p = 0.66$ ; *trx1Δtrx2Δ*, n=4 each,  $p = 0.90$ ). **D)** Relative *HSP12* levels were

significantly different between wt control and mc-*IRA2* strains (n=15 and 9, respectively,  $p=1.0 \times 10^{-14}$ ), between wt mc-*IRA2* and *tsalΔ* mc-*IRA2* strains (n=9 and 8, respectively,  $p=1.9 \times 10^{-6}$ ), between wt mc-*IRA2* and *tsalC171S* mc-*IRA2* strains (n=9 and 4, respectively,  $p=0.026$ ), between wt mc-*IRA2* and *tsalΔYFC171S* mc-*IRA2* strains (n=9 and 6, respectively,  $p=0.00083$ ) and between wt mc-*IRA2* and *pde2Δ* mc-*IRA2* strains (n=9 and 6, respectively,  $p=4.8 \times 10^{-8}$ ). No significant difference was seen between wt mc-*IRA2* and *tsalΔYF* mc-*IRA2* strains (n=9 and 3, respectively,  $p=0.53$ ). Relative *CTTI* levels were significantly different between wt control and mc-*IRA2* strains (n=24 and 21, respectively,  $p=3.4 \times 10^{-13}$ ), between wt mc-*IRA2* and *tsalΔ* mc-*IRA2* strains (n=21 and 6, respectively,  $p=0.0073$ ), between wt mc-*IRA2* and *tsalC171S* mc-*IRA2* strains (n=9 and 4, respectively,  $p=0.026$ ), between wt mc-*IRA2* and *tsalΔYF* mc-*IRA2* strains (n=21 and 3, respectively,  $p=0.027$ ), between wt mc-*IRA2* and *tsalΔYFC171S* mc-*IRA2* strains (n=21 and 6, respectively,  $p=4.9 \times 10^{-5}$ ) and between wt mc-*IRA2* and *pde2Δ* mc-*IRA2* strains (n=21 and 6, respectively,  $p=3.5 \times 10^{-7}$ ). **F**) Doubling times of control and mc-*IRA2* strains are significantly different for the wt control (n=3 each,  $p=0.00042$ ), the wt o/e *PDE2* (n=3 each,  $p=0.00091$ ) and for the *tsalΔ* mc-*PDE2* strain (n=3,  $p=0.0058$ ) but not for the *tsalΔ* control strain (n=3 each,  $p=0.20$ ).

**Figure 4. A)** Lifespans of wt control and o/e *TSAl* strains (Hanzen et al., 2016) are significantly different using the Mann Whitney U test (n=377 and 439 cells,  $p=1.0 \times 10^{-25}$ ). Lifespans of *pde2Δ* control and *pde2Δ* o/e *TSAl* strains are not significantly different (n=81 and 84, respectively,  $p=0.58$ ). **C)** Hsp12 levels are significantly different between control and o/e *TSAl* strains (n=3,  $p=0.033$ ) whereas Act1 levels are not (n=3,  $p=0.69$ ). **D)** H<sub>2</sub>O<sub>2</sub> resistance is significantly different between wt control and o/e *TSAl* strains ( $p=0.0085$ ), between wt o/e *TSAl* and *pde2Δ* o/e *TSAl* strains ( $p=0.0082$ ) but not between *pde2Δ* control and o/e *TSAl* strains ( $p=0.56$ ).

**Figure 5. A).** Relative Ras2-GTP/total Ras values in the control and mc-*IRA2* are significantly different in a two tailed t-test with unequal variance for the wt (n=3,  $p=0.0041$ ). Values for the *pde2Δ* control vs mc-*IRA2* (n=3,  $p=0.015$ ) and the *tsalΔ* control vs mc-*IRA2* (n=3,  $p=0.030$ ) are significantly different in a two-tailed t-test with equal variance. **B)** cAMP levels are significantly different only between wt and *pde2Δ* strains (n=4 each, wt yEP24 vs pde2 yEP24,  $p=0.0050$  and wt pKF56 vs pde2 pKF56,  $p=1.4 \times 10^{-5}$ ). No significant differences were seen between wt and *tsalΔ* strains (n=4 each, wt yEP24 vs *tsalΔ* yEP24,  $p=0.86$  and wt pKF56 vs *tsalΔ* pKF56  $p=0.47$ ) or between the wt yEP24 and wt pKF56 ( $p=0.13$ ). **E)** The abundances of all the three T241-phosphorylated peptides decreased significantly upon adding either 0.4 mM or 0.8 mM H<sub>2</sub>O<sub>2</sub> (for the C243-SH peptide  $p=0.05$  and  $0.037$  respectively, for the C243-SSG peptide  $p=0.015$  and  $0.025$  respectively whereas for the C243-SO<sub>3</sub>H peptide  $p=0.011$  and  $0.0049$ , respectively). The quantity of the C243-SH T241 non-modified peptide did not change significantly upon the addition of 0.4 and 0.8 mM H<sub>2</sub>O<sub>2</sub> ( $p=0.20$  and  $0.54$ , respectively) whereas the C243-SSG T241 non-modified peptide increased significantly following 0.4 mM ( $p=0.038$ ) but not at 0.8 mM ( $p=0.17$ ).

**Figure 6. G)** H<sub>2</sub>O<sub>2</sub> resistance is significantly different between wt pRS313 vector control and *tpk2Δtpk3Δ* pRS313 vector control strains ( $p=0.030$ ), *tpk1Δtpk2Δtpk3Δ pTPK1* and *ptpk1C243A* strains ( $p=0.030$ ), *tpk1Δtpk2Δtpk3Δ pTPK1* and *ptpk1T241A* strains ( $p=0.0020$ ) but not *tpk2Δtpk3Δ* pRS313 and *tpk1Δtpk2Δtpk3Δ pTPK1* strains ( $p=1.00$ ). **I)** Tpk1-S-SG levels are significantly different between wt with and without H<sub>2</sub>O<sub>2</sub> ( $p=0.012$ ), but not between wt and *tsalΔ* without H<sub>2</sub>O<sub>2</sub> ( $p=0.453$ ) or in the *tsalΔ* with and without H<sub>2</sub>O<sub>2</sub> ( $p=0.264$ ). **J)** H<sub>2</sub>O<sub>2</sub> resistance is significantly different between control *pTPK1* and *ptpk1C243A* strains ( $p=0.043$ ), control *pTPK1* and *pTSAl pTPK1* strains ( $p=0.0072$ ), *pTSAl pTPK1* and *ptpk1C243A* strains ( $p=0.0014$ ) but not between control *ptpk1C243A* and *pTSAl*

*ptpk1C243A* strains ( $p=0.064$ ). **K**) H<sub>2</sub>O<sub>2</sub> resistance is significantly different between *TSAl pTPK1* and *ptpk1T241A* strains ( $p=0.022$ ), *TSAl pTPK1* and *tsalΔ pTPK1* strains ( $p=0.031$ ), *tsalΔ pTPK1* and *ptpk1T241A* strains ( $p=0.013$ ) but not between *TSAl* and *tsalΔ ptpk1T241A* strains ( $p=0.090$ ).



**Supplementary Table S1.** Key resources table

| REAGENT or RESOURCE                                                                    | SOURCE                             | IDENTIFIER                   |
|----------------------------------------------------------------------------------------|------------------------------------|------------------------------|
| <b><u>Antibodies</u></b>                                                               |                                    |                              |
| Mouse monoclonal anti-Tpk1                                                             | Santa Cruz Biotechnology           | Sc-374592, RRID: AB_10990730 |
| Goat polyclonal anti-Bcyl1                                                             | Santa Cruz Biotechnology           | Sc-6734, RRID: AB_671758     |
| Rabbit IgG (anti-ProtA)                                                                | Sigma Aldrich                      | I5006, RRID: AB_1163659      |
| Goat polyclonal anti-Ras2                                                              | Santa Cruz Biotechnology           | Sc-6759, RRID: AB_672465     |
| Mouse monoclonal anti-Glutathione [D8]                                                 | Abcam                              | ab19534, RRID: AB_880243     |
| <b><u>Bacterial and Virus Strains</u></b>                                              |                                    |                              |
| <i>E. coli</i> BL21 strain expressing pGEX2T-1-GST-RBD                                 | This study, (Peeters et al., 2017) |                              |
| <b><u>Chemicals, Peptides, and Recombinant Proteins</u></b>                            |                                    |                              |
| G418                                                                                   | Acros Organics                     | Cat #: 329400050             |
| ClonNAT                                                                                | Werner Bioagents                   | Cat #: 5.005.000             |
| Hygromycin B                                                                           | Formedium                          | Cat #: HYG5000               |
| Phleomycin                                                                             | Sigma Aldrich                      | P9564                        |
| 5-fluoroorotic acid                                                                    | Sigma Aldrich                      | F5013                        |
| EZ-Link Sulfo-NHS-LC Biotin                                                            | Thermo Fisher                      | Cat #: 21335                 |
| Trichloroacetic acid                                                                   | Sigma Aldrich                      | Cat #: T6399                 |
| KSCN                                                                                   | Sigma Aldrich                      | Cat #: P2713                 |
| (NH <sub>4</sub> ) <sub>2</sub> Fe(SO <sub>4</sub> ) <sub>2</sub> • 6 H <sub>2</sub> O | Sigma Aldrich                      | Cat #: 215406                |
| TRIzol Reagent                                                                         | Thermo Fisher                      | Cat #: 15596026              |
| DNase, RNase-free set                                                                  | Qiagen                             | Cat #: 79254                 |
| cOmplete Mini EDTA-free protease inhibitor                                             | Roche Applied Science              | Cat #: 11873580001           |
| Glutathione-S-Transferase-Raf1-Binding-Domain (GST-RBD)                                | This study, (Peeters et al., 2017) |                              |
| Glutathione Sepharose beads                                                            |                                    |                              |

|                                                      |                          |                                                     |
|------------------------------------------------------|--------------------------|-----------------------------------------------------|
| 12% Bis-Tris NUPAGE gels                             | Thermo Fisher            | Cat #: NP0349BOX                                    |
| MOPS running buffer                                  | Thermo Fisher            | Cat #: NP0001                                       |
| Immobilon-FL PVDF membrane                           | Millipore                | Cat #: IPFL00010                                    |
| Ni <sup>2+</sup> -Sepharose beads                    | GE Healthcare            | Cat #: 17-5318-06                                   |
| Trypsin Gold, mass spectrometry grade                | Promega                  | Cat #: V5280                                        |
| N-ethylmaleimide                                     | Sigma-Aldrich            | Cat #: E3876                                        |
| Methoxypolyethylene glycol maleimide (mPEG)          | Sigma Aldrich            | Cat #: 63187                                        |
| 10% Criterion TGX Precast Midi Protein Gel           | Bio-Rad                  | Cat #: 5671034                                      |
| Peptide Retention Time Calibration Mixture           | Pierce, Thermo Fisher    | Cat #: 88320                                        |
| <b><u>Critical Commercial Assays</u></b>             |                          |                                                     |
| PureLink RNA Mini kit                                | Thermo-Fisher            | Cat #: 12183025                                     |
| QuantiTect Reverse Transcription Kit                 | Qiagen                   | Cat #: 205313                                       |
| iQ SYBR Green Supermix                               | BioRad                   | Cat #: 170-8882                                     |
| LANCE cAMP 384 kit                                   | Perkin Elmer             | Cat #: AD0262                                       |
| <b><u>Deposited Data</u></b>                         |                          |                                                     |
| Tpk1 MS-data                                         | PRIDE                    | PXD012617                                           |
| <b><u>Experimental Models: Organisms/Strains</u></b> |                          |                                                     |
| BY4742, wt                                           | (Brachmann et al., 1998) | MAT <b>alpha</b> <i>his3Δ1 leu2Δ0 lys2Δ0 ura3Δ0</i> |
| YMM145, <i>tsa1C48S</i>                              | (Bodvard et al., 2017)   | BY4742 <i>tsa1C48S</i>                              |
| YMM146, <i>tsa1C171S</i>                             | (Bodvard et al., 2017)   | BY4742 <i>tsa1C171S</i>                             |
| YMM147, <i>tsa1ΔYF</i>                               | (Bodvard et al., 2017)   | BY4742 <i>tsa1(1-184)</i>                           |
| YMM148, <i>tsa1C171SΔYF</i>                          | (Bodvard et al., 2017)   | BY4742 <i>tsa1(1-184)C171S</i>                      |
| YMM114, <i>tsa1Δ</i>                                 | (Molin et al., 2011)     | BY4742 <i>tsa1Δ::natMX4</i>                         |
| YMM113, <i>ras2Δ</i>                                 | (Molin et al., 2011)     | BY4742 <i>ras2Δ::kanMX4</i>                         |

|                                |                                              |                                                                                                          |
|--------------------------------|----------------------------------------------|----------------------------------------------------------------------------------------------------------|
| YMM170, <i>ras2Δtsa1Δ</i>      | This study                                   | BY4742<br><i>ras2Δ::kanMX4</i><br><i>tsa1Δ::natMX4</i>                                                   |
| BY4742, <i>pde2Δ</i>           | Research Genetics,<br>(Giaever et al., 2002) | BY4742<br><i>pde2Δ::kanMX4</i>                                                                           |
| YMM171, <i>ras2Δpde2Δ</i>      | This study                                   | BY4742<br><i>ras2Δ::kanMX4</i><br><i>pde2Δ::hphMX4</i>                                                   |
| YMM172, <i>pde2Δtsa1Δ</i>      | This study                                   | BY4742<br><i>pde2Δ::kanMX4</i><br><i>tsa1Δ::natMX4</i>                                                   |
| YMM173, <i>ras2Δpde2Δtsa1Δ</i> | This study                                   | BY4742<br><i>ras2Δ::kanMX4</i><br><i>pde2Δ::hphMX4</i><br><i>tsa1Δ::natMX4</i>                           |
| YMM174, <i>msn2Δmsn4Δ</i>      | This study                                   | BY4742<br><i>msn2Δ::hphMX4</i><br><i>msn4Δ::natMX4</i>                                                   |
| YMM143, <i>trx1Δtrx2Δ</i>      | (Bodvard et al., 2017)                       | BY4742<br><i>trx1Δ::hphMX4</i><br><i>trx2Δ::natMX4</i>                                                   |
| YMM130, wt control             | (Hanzen et al., 2016)                        | MAT <b>alpha</b><br><i>his3ΔI::pRS403</i> ,<br><i>leu2Δ0 lys2Δ0 ura3Δ0</i>                               |
| <i>o/e TSA1</i>                | (Hanzen et al., 2016)                        | MAT <b>alpha</b><br><i>his3ΔI::pRS403-Myc-TSA1</i> , <i>leu2Δ0 lys2Δ0 ura3Δ0</i>                         |
| YMM175, <i>pde2Δ control</i>   | This study                                   | MAT <b>alpha</b><br><i>his3ΔI::pRS403</i> ,<br><i>leu2Δ0 lys2Δ0 ura3Δ0</i><br><i>pde2Δ::kanMX4</i>       |
| YMM176, <i>pde2Δ o/e TSA1</i>  | This study                                   | MAT <b>alpha</b><br><i>his3ΔI::pRS403-Myc-TSA1</i> , <i>leu2Δ0 lys2Δ0 ura3Δ0</i><br><i>pde2Δ::kanMX4</i> |

|                                                         |            |                                                                                                                                            |
|---------------------------------------------------------|------------|--------------------------------------------------------------------------------------------------------------------------------------------|
| YMM177                                                  | This study | <b>MAT a</b> , <i>his3ΔI</i><br><i>leu2Δ0 lys2Δ0 ura3Δ0</i><br><i>ras1Δ::hphMX4</i>                                                        |
| YMM178                                                  | This study | BY-2n<br><i>met15Δ0/MET15</i><br><i>lys2Δ0/LYS2</i><br><i>tpk1Δ::kanMX4/TPK1</i><br><i>tpk2Δ::natMX4/TPK2</i><br><i>tpk3Δ::hphMX4/TPK3</i> |
| YMM179, <i>tpk2Δtpk3Δ</i>                               | This study | BY4742<br><i>tpk2Δ::natMX4</i><br><i>tpk3Δ::hphMX4</i>                                                                                     |
| YMM180, <i>tpk1Δtpk2Δtpk3Δ pTPK1-URA</i>                | This study | BY4742<br><i>tpk1Δ::kanMX4</i><br><i>tpk2Δ::natMX4</i><br><i>tpk3Δ::hphMX4</i><br><i>pRS316-TPK1</i>                                       |
| YMM181, <i>tpk1Δtpk2Δtpk3Δ pTPK1-URA vector control</i> | This study | BY4742<br><i>tpk1Δ::kanMX4</i><br><i>tpk2Δ::natMX4</i><br><i>tpk3Δ::hphMX4</i><br><i>pRS313 pTPK1-URA3</i>                                 |
| YMM182, <i>tpk1Δtpk2Δtpk3Δ pTPK1-URA pTPK1</i>          | This study | BY4742<br><i>tpk1Δ::kanMX4</i><br><i>tpk2Δ::natMX4</i><br><i>tpk3Δ::hphMX4</i><br><i>pRS313-TPK1 pTPK1-URA3</i>                            |
| YMM183, <i>tpk1Δtpk2Δtpk3Δ pTPK1-URA3 ptpk1C243A</i>    | This study | BY4742<br><i>tpk1Δ::kanMX4</i><br><i>tpk2Δ::natMX4</i><br><i>tpk3Δ::hphMX4</i><br><i>pRS313-tpk1C243A</i><br><i>pTPK1-URA3</i>             |
| YMM184, <i>tpk1Δtpk2Δtpk3Δ pTPK1-URA3 ptpk1C243D</i>    | This study | BY4742<br><i>tpk1Δ::kanMX4</i><br><i>tpk2Δ::natMX4</i><br><i>tpk3Δ::hphMX4</i><br><i>pRS313-tpk1C243D</i><br><i>pTPK1-URA3</i>             |

|                                                    |                                  |                                                                                                                                |
|----------------------------------------------------|----------------------------------|--------------------------------------------------------------------------------------------------------------------------------|
| YMM185, <i>tpk1Δtpk2Δtpk3ΔpTPK1-URA3ptpk1T241A</i> | This study                       | BY4742<br><i>tpk1Δ::kanMX4</i><br><i>tpk2Δ::natMX4</i><br><i>tpk3Δ::hphMX4</i><br><i>pRS313-tpk1T241A</i><br><i>pTPK1-URA3</i> |
| YMM186, <i>tpk1Δtpk2Δtpk3ΔpTPK1</i>                | This study                       | BY4742<br><i>tpk1Δ::kanMX4</i><br><i>tpk2Δ::natMX4</i><br><i>tpk3Δ::hphMX4</i><br><i>pRS313-TPK1</i>                           |
| YMM187, <i>tpk1Δtpk2Δtpk3Δptpk1C243A</i>           | This study                       | BY4742<br><i>tpk1Δ::kanMX4</i><br><i>tpk2Δ::natMX4</i><br><i>tpk3Δ::hphMX4</i><br><i>pRS313-tpk1C243A</i>                      |
| YMM188, <i>tpk1Δtpk2Δtpk3Δptpk1C243D</i>           | This study                       | BY4742<br><i>tpk1Δ::kanMX4</i><br><i>tpk2Δ::natMX4</i><br><i>tpk3Δ::hphMX4</i><br><i>pRS313-tpk1C243D</i>                      |
| YMM189, <i>tpk1Δtpk2Δtpk3Δptpk1T241A</i>           | This study                       | BY4742<br><i>tpk1Δ::kanMX4</i><br><i>tpk2Δ::natMX4</i><br><i>tpk3Δ::hphMX4</i><br><i>pRS313-tpk1T241A</i>                      |
| YMM190, <i>ras2Δtrx1Δtrx2Δ</i>                     | This study                       | BY4742<br><i>ras2Δ::kanMX4</i><br><i>trx1Δ::hphMX4</i><br><i>trx2Δ::natMX4</i>                                                 |
| YMM191                                             | This study                       | BY4741<br><i>tsa1Δ::bleMX4</i>                                                                                                 |
| YMM192, <i>tpk2Δtpk3Δtsa1Δ</i>                     | This study                       | BY4741<br><i>tpk2Δ::natMX4</i><br><i>tpk3Δ::hphMX4</i><br><i>tsa1Δ::bleMX4</i>                                                 |
| BY4741, wt                                         | (Brachmann et al., 1998)         | MAT a <i>his3Δ1 leu2Δ0</i><br><i>met15Δ0 ura3Δ0</i>                                                                            |
| <i>cdc25-1</i>                                     | Charlie Boone, (Li et al., 2011) | BY4741, <i>cdc25-1-3'UTR(CDC25)-::kanMX4-3'UTR(SYS1)</i>                                                                       |

|                                                              |            |                                                                                                                                                                                     |
|--------------------------------------------------------------|------------|-------------------------------------------------------------------------------------------------------------------------------------------------------------------------------------|
| WR1832, <i>TPK1-HBH tpk2Δtpk3Δ</i>                           | This study | BY4742 <i>TPK1-HBH::TRP1</i><br><i>tpk2Δ::natMX4</i><br><i>tpk3Δ::hphMX4</i><br><i>trp1Δ::kanMX4</i>                                                                                |
| yCP101, <i>tpk1Δtpk2Δtpk3Δ pTPK1-URA vector control</i>      | This study | MAT <b>a</b><br><i>his3Δ1::pRS403</i> ,<br><i>leu2Δ0 lys2Δ0 ura3Δ0</i><br><i>tpk1Δ::kanMX4</i><br><i>tpk2Δ::natMX4</i><br><i>tpk3Δ::hphMX4</i><br><i>pRS316-TPK1</i>                |
| yCP102, <i>tpk1Δtpk2Δtpk3Δ ptpk1C243A-URA vector control</i> | This study | MAT <b>alpha</b><br><i>his3Δ1::pRS403</i> ,<br><i>leu2Δ0 lys2Δ0 ura3Δ0</i><br><i>tpk1Δ::kanMX4</i><br><i>tpk2Δ::natMX4</i><br><i>tpk3Δ::hphMX4</i><br><i>pRS316-tpk1C243A</i>       |
| yCP103, <i>tpk1Δtpk2Δtpk3Δ pTPK1-URA o/e TSA1</i>            | This study | MAT <b>alpha</b><br><i>his3Δ1::pRS403-myc-TSA1</i> , <i>leu2Δ0 lys2Δ0 ura3Δ0</i><br><i>tpk1Δ::kanMX4</i><br><i>tpk2Δ::natMX4</i><br><i>tpk3Δ::hphMX4</i><br><i>pRS316-TPK1</i>      |
| yCP104, <i>tpk1Δtpk2Δtpk3Δ ptpk1C243A-URA o/e TSA1</i>       | This study | MAT <b>alpha</b><br><i>his3Δ1::pRS403-myc-TSA1</i> , <i>leu2Δ0 lys2Δ0 ura3Δ0</i><br><i>tpk1Δ::kanMX4</i><br><i>tpk2Δ::natMX4</i><br><i>tpk3Δ::hphMX4</i><br><i>pRS316-tpk1C243A</i> |
| yCP105, <i>tpk1Δtpk2Δtpk3Δ tsa1Δ pTPK1</i>                   | This study | BY4742<br><i>tpk1Δ::kanMX4</i><br><i>tpk2Δ::natMX4</i><br><i>tpk3Δ::hphMX4</i><br><i>tsa1Δ::bleMX4</i><br><i>pRS313-TPK1</i>                                                        |

|                                               |                                  |                                                                                                                                   |
|-----------------------------------------------|----------------------------------|-----------------------------------------------------------------------------------------------------------------------------------|
| yCP106, <i>tpk1Δtpk2Δtpk3Δtsa1Δptpk1T241A</i> | This study                       | BY4742<br><i>tpk1Δ::kanMX4</i><br><i>tpk2Δ::natMX4</i><br><i>tpk3Δ::hphMX4</i><br><i>tsa1Δ::bleMX4</i><br><i>pRS313-tpk1T241A</i> |
| yCP107, <i>TPK1-HBH tpk2Δtpk3Δtsa1Δ</i>       | This study                       | BY4742 <i>TPK1-HBH::TRP1</i><br><i>tpk2Δ::natMX4</i><br><i>tpk3Δ::hphMX4</i><br><i>trp1Δ::kanMX4</i><br><i>tsa1Δ::bleMX4</i>      |
| <b><u>Oligonucleotides</u></b>                |                                  |                                                                                                                                   |
| <i>ACTIF</i>                                  | (Caballero et al., 2011)         | For Q-PCR of <i>ACT1</i><br>CTGCCGGTATTG<br>ACCAAAC                                                                               |
| <i>ACTIR</i>                                  | (Caballero et al., 2011)         | For Q-PCR of <i>ACT1</i><br>CGGTGAATTTCC<br>TTTTGCATT                                                                             |
| <i>CTTIF</i>                                  | This study                       | For Q-PCR of <i>CTT1</i><br>GCTTCTCAATAC<br>TCAAGACCAG                                                                            |
| <i>CTTIR</i>                                  | This study                       | For Q-PCR of <i>CTT1</i><br>GCGGCGTATGTA<br>ATATCACTC                                                                             |
| <i>HSP12F</i>                                 | (Caballero et al., 2011)         | For Q-PCR of <i>HSP12</i><br>AGGTCGCTGGTA<br>AGGTTC                                                                               |
| <i>HSP12R</i>                                 | (Caballero et al., 2011)         | For Q-PCR of <i>HSP12</i><br>ATCGTTCAACTT<br>GGACTTGG                                                                             |
| <b><u>Recombinant DNA</u></b>                 |                                  |                                                                                                                                   |
| pAMG                                          | (Gorner et al., 1998)            | Msn2-GFP expressed under the control of the <i>ADH1</i> promoter, centromeric <i>LEU2</i> vector                                  |
| pHyPer3 (pRS416- <i>GPD-HyPer3</i> )          | This study, (Bilan et al., 2013) | HyPer3 codon-optimized for yeast, in yeast CEN/ARS, pGPD, <i>URA3</i> plasmid                                                     |

|                                                |                                                        |                                                    |
|------------------------------------------------|--------------------------------------------------------|----------------------------------------------------|
| pHyPer3C199S (pRS416- <i>GPD-HyPer3C199S</i> ) | This study, (Bilan et al., 2013)                       | HyPer3C199S                                        |
| yCPlac33                                       | (Gietz & Sugino, 1988)                                 | yeast CEN <i>URA3</i> vector                       |
| pMW1                                           | (Harashima, Anderson, Yates, & Heitman, 2006)          | <i>RAS2</i> in CEN <i>URA3</i> plasmid             |
| yEP24                                          | (Botstein et al., 1979)                                | yeast 2 $\mu$ , <i>URA3</i> vector                 |
| pKF56                                          | (Tanaka et al., 1990)                                  | <i>IRA2</i> in yEP24                               |
| pRS425                                         | (Christianson, Sikorski, Dante, Shero, & Hieter, 1992) | yeast 2 $\mu$ , <i>LEU2</i> vector                 |
| yEP13- <i>PDE2</i>                             | (Hlavata, Aguilaniu, Pichova, & Nystrom, 2003)         | <i>PDE2</i> in yeast 2 $\mu$ , <i>LEU2</i> plasmid |
| pRS313                                         | (Sikorski & Hieter, 1989)                              | yeast CEN/ARS, <i>HIS3</i> empty vector            |
| pRS313- <i>TPK1</i>                            | (Voordeckers et al., 2011)                             | <i>TPK1</i> in pRS313                              |
| pRS313- <i>tpk1C243A</i>                       | This study                                             | <i>tpk1C243A</i> in pRS313                         |
| pRS313- <i>tpk1C243D</i>                       | This study                                             | <i>tpk1C243D</i> in pRS313                         |
| pRS313- <i>tpk1T241A</i>                       | This study                                             | <i>tpk1T241A</i> in pRS313                         |
| pRS316                                         | (Sikorski & Hieter, 1989)                              | yeast CEN/ARS, <i>URA3</i> empty vector            |
| pRS316- <i>myc-TSA1</i>                        | (Biteau et al., 2003)                                  | Myc- <i>TSA1</i> in pRS316                         |
| pRS316- <i>myc-tsa1C48S</i>                    | (Molin et al., 2011)                                   | Myc- <i>tsa1C48S</i> in pRS316                     |
| pRS316- <i>myc-tsa1C171S</i>                   | (Molin et al., 2011)                                   | Myc- <i>tsa1C171S</i> in pRS316                    |
| pRS315                                         | (Sikorski & Hieter, 1989)                              | yeast CEN/ARS, <i>LEU2</i> empty vector            |
| B561 (pRS315- <i>RAS2G19V</i> )                | (Bartels, Mitchell, Dong, & Deschenes, 1999)           | <i>RAS2G19V</i> in pRS315                          |
| pRS315-ProtA                                   | This study                                             | ProteinA in pRS315                                 |
| pRS315- <i>TRX2-ProteinA</i>                   | (Bodvard et al., 2017)                                 | <i>TRX2-ProteinA</i> in pRS315                     |
| pRS315- <i>trx2C34S-ProteinA</i>               | This study                                             | <i>trx2C34S-ProteinA</i> in pRS315                 |



|                                           |                                               |                                     |
|-------------------------------------------|-----------------------------------------------|-------------------------------------|
| pRS315- <i>trx2C31SC34S-ProteinA</i>      | This study                                    | <i>trx2C31SC34S-ProtA</i> in pRS315 |
| yEPlac195                                 | (Gietz & Sugino, 1988)                        | yeast 2 $\mu$ , <i>URA3</i> vector  |
| pXP1                                      | (Pan & Heitman, 1999)                         | <i>TPK1</i> in yEPlac195            |
| p <i>TPK1-URA3</i> (pRS316- <i>TPK1</i> ) | Karin Voordeckers                             | <i>TPK1</i> in pRS316               |
| p <i>tpk1C243A-URA3</i>                   | This study                                    | <i>tpk1C243A</i> in pRS316          |
| <b><u>Software and Algorithms</u></b>     |                                               |                                     |
| MATLAB                                    | Mathworks                                     | version 2016b                       |
| CellX                                     | (Mayer, Dimopoulos, Rudolf, & Stelling, 2013) |                                     |
| Scrödinger Suite                          | Schrödinger LLC                               |                                     |
| GROMACS                                   | (Abraham et al., 2015)                        |                                     |
| Amber tools                               | (Salomon-Ferrer, Case, & Walker, 2013)        |                                     |

### Supplementary references

- Abraham, M. J., Murtola, T., Schultz, R., Pall, S., Smith, J. C., Hess, B., & Lindahl, E. (2015). GROMACS: High performance molecular simulations through multi-level parallelism from laptops to supercomputers. *SoftwareX*, 54(7), 1932-1940.
- Bartels, D. J., Mitchell, D. A., Dong, X., & Deschenes, R. J. (1999). Erf2, a novel gene product that affects the localization and palmitoylation of Ras2 in *Saccharomyces cerevisiae*. *Mol Cell Biol*, 19(10), 6775-6787.
- Berendsen, H. J. C., Postma, J. P. M., Vangunsteren, W. F., Dinola, A., & Haak, J. R. (1984). Molecular-Dynamics with Coupling to an External Bath. *Journal of Chemical Physics*, 81(8), 3684-3690. doi:Doi 10.1063/1.448118
- Bilan, D. S., Pase, L., Joosen, L., Gorokhovatsky, A. Y., Ermakova, Y. G., Gadella, T. W. J., . . . Belousov, V. V. (2013). HyPer-3: A Genetically Encoded H<sub>2</sub>O<sub>2</sub> Probe with Improved Performance for Ratiometric and Fluorescence Lifetime Imaging. *ACS chemical biology*, 8(3), 535-542. doi:10.1021/cb300625g
- Biteau, B., Labarre, J., & Toledano, M. B. (2003). ATP-dependent reduction of cysteine-sulphinic acid by *S. cerevisiae* sulphiredoxin. *Nature*, 425(6961), 980-984.
- Bodvard, K., Peeters, K., Roger, F., Romanov, N., Igbaria, A., Toledano, M. B., . . . Molin, M. (2017). Light-sensing via hydrogen peroxide and a peroxiredoxin. *Nat Commun*, 8, 14791. doi:10.1038/ncomms14791
- Botstein, D., Falco, S. C., Stewart, S. E., Brennan, M., Scherer, S., Stinchcomb, D. T., . . . Davis, R. W. (1979). Sterile host yeasts (SHY): a eukaryotic system of biological containment for recombinant DNA experiments. *Gene*, 8(1), 17-24.

- Brachmann, C. B., Davies, A., Cost, G. J., Caputo, E., Li, J., Hieter, P., & Boeke, J. D. (1998). Designer deletion strains derived from *Saccharomyces cerevisiae* S288C: a useful set of strains and plasmids for PCR-mediated gene disruption and other applications. *Yeast*, *14*(2), 115-132.
- Caballero, A., Ugidos, A., Liu, B., Oling, D., Kvint, K., Hao, X., . . . Nystrom, T. (2011). Absence of mitochondrial translation control proteins extends life span by activating sirtuin-dependent silencing. *Molecular cell*, *42*(3), 390-400. doi:10.1016/j.molcel.2011.03.021
- Christianson, T. W., Sikorski, R. S., Dante, M., Shero, J. H., & Hieter, P. (1992). Multifunctional yeast high-copy-number shuttle vectors. *Gene*, *110*(1), 119-122. doi:0378-1119(92)90454-W [pii]
- Colombo, S., & Martegani, E. (2014). Methods to study the Ras2 protein activation state and the subcellular localization of Ras-GTP in *Saccharomyces cerevisiae*. *Methods Mol Biol*, *1120*, 391-405. doi:10.1007/978-1-62703-791-4\_24
- Costanzo, M., Baryshnikova, A., Bellay, J., Kim, Y., Spear, E. D., Sevier, C. S., . . . Boone, C. (2010). The genetic landscape of a cell. *Science*, *327*(5964), 425-431. doi:10.1126/science.1180823
- Darden, T., York, D., & Pedersen, L. (1993). Particle Mesh Ewald - an N.Log(N) Method for Ewald Sums in Large Systems. *Journal of Chemical Physics*, *98*(12), 10089-10092. doi:10.1063/1.464397
- Essmann, U., Perera, L., Berkowitz, M. L., Darden, T., Lee, H., & Pedersen, L. G. (1995). A Smooth Particle Mesh Ewald Method. *Journal of Chemical Physics*, *103*(19), 8577-8593. doi:10.1063/1.470117
- Giaever, G., Chu, A. M., Ni, L., Connelly, C., Riles, L., Veronneau, S., . . . Johnston, M. (2002). Functional profiling of the *Saccharomyces cerevisiae* genome. *Nature*, *418*(6896), 387-391.
- Gietz, R. D., & Sugino, A. (1988). New yeast-*Escherichia coli* shuttle vectors constructed with in vitro mutagenized yeast genes lacking six-base pair restriction sites. *Gene*, *74*(2), 527-534.
- Goldstein, A. L., & McCusker, J. H. (1999). Three new dominant drug resistance cassettes for gene disruption in *Saccharomyces cerevisiae*. *Yeast*, *15*(14), 1541-1553.
- Gorner, W., Durchschlag, E., Martinez-Pastor, M. T., Estruch, F., Ammerer, G., Hamilton, B., . . . Schuller, C. (1998). Nuclear localization of the C2H2 zinc finger protein Msn2p is regulated by stress and protein kinase A activity. *Genes Dev*, *12*(4), 586-597.
- Gueldener, U., Heinisch, J., Koehler, G. J., Voss, D., & Hegemann, J. H. (2002). A second set of loxP marker cassettes for Cre-mediated multiple gene knockouts in budding yeast. *Nucleic Acids Res*, *30*(6), e23.
- Hanzen, S., Vielfort, K., Yang, J., Roger, F., Andersson, V., Zamarbide-Fores, S., . . . Nystrom, T. (2016). Lifespan Control by Redox-Dependent Recruitment of Chaperones to Misfolded Proteins. *Cell*, *166*(1), 140-151. doi:10.1016/j.cell.2016.05.006
- Harashima, T., Anderson, S., Yates, J. R., 3rd, & Heitman, J. (2006). The kelch proteins Gpb1 and Gpb2 inhibit Ras activity via association with the yeast RasGAP neurofibromin homologs Ira1 and Ira2. *Molecular cell*, *22*(6), 819-830. doi:10.1016/j.molcel.2006.05.011
- Hasan, R., Leroy, C., Isnard, A. D., Labarre, J., Boy-Marcotte, E., & Toledano, M. B. (2002). The control of the yeast H<sub>2</sub>O<sub>2</sub> response by the Msn2/4 transcription factors. *Mol Microbiol*, *45*(1), 233-241.
- Hess, B., Bekker, H., Berendsen, H. J. C., & Fraaije, J. G. E. M. (1997). LINCS: A linear constraint solver for molecular simulations. *Journal of Computational Chemistry*, *18*(12), 1463-1472. doi:10.1002/(Sici)1096-987x(199709)18:12<1463::Aid-Jcc4>3.0.Co;2-H
- Hlavata, L., Aguilaniu, H., Pichova, A., & Nystrom, T. (2003). The oncogenic RAS2(val19) mutation locks respiration, independently of PKA, in a mode prone to generate ROS. *Embo J*, *22*(13), 3337-3345. doi:10.1093/emboj/cdg314
- Hoover, W. G. (1985). Canonical Dynamics - Equilibrium Phase-Space Distributions. *Physical Review A*, *31*(3), 1695-1697. doi:DOI 10.1103/PhysRevA.31.1695
- Jacobson, M. P., Friesner, R. A., Xiang, Z., & Honig, B. (2002). On the role of the crystal environment in determining protein side-chain conformations. *J Mol Biol*, *320*(3), 597-608.

- Kong, A. T., Leprevost, F. V., Avtonomov, D. M., Mellacheruvu, D., & Nesvizhskii, A. I. (2017). MSFragger: ultrafast and comprehensive peptide identification in mass spectrometry-based proteomics. *Nat Methods*, *14*(5), 513-520. doi:10.1038/nmeth.4256
- Li, Z., Vizeacoumar, F. J., Bahr, S., Li, J., Warringer, J., Vizeacoumar, F. S., . . . Boone, C. (2011). Systematic exploration of essential yeast gene function with temperature-sensitive mutants. *Nature biotechnology*, *29*(4), 361-367. doi:10.1038/nbt.1832
- Longtine, M. S., McKenzie, A., 3rd, Demarini, D. J., Shah, N. G., Wach, A., Brachat, A., . . . Pringle, J. R. (1998). Additional modules for versatile and economical PCR-based gene deletion and modification in *Saccharomyces cerevisiae*. *Yeast*, *14*(10), 953-961. doi:10.1002/(SICI)1097-0061(199807)14:10<953::AID-YEA293>3.0.CO;2-U
- Mashhoon, N., Carmel, G., Pflugrath, J. W., & Kuret, J. (2001). Structure of the unliganded cAMP-dependent protein kinase catalytic subunit from *Saccharomyces cerevisiae*. *Arch Biochem Biophys*, *387*(1), 11-19. doi:10.1006/abbi.2000.2241
- Mayer, C., Dimopoulos, S., Rudolf, F., & Stelling, J. (2013). Using CellX to Quantify Intracellular Events. *101*(1), 14.22.11-14.22.20. doi:doi:10.1002/0471142727.mb1422s101
- Molin, M., Yang, J., Hanzen, S., Toledano, M. B., Labarre, J., & Nystrom, T. (2011). Life span extension and H<sub>2</sub>O<sub>2</sub>-resistance elicited by caloric restriction require the peroxiredoxin Tsa1 in *Saccharomyces cerevisiae*. *Mol Cell*, *43*(5), 823-833. doi:10.1016/j.molcel.2011.07.027
- Pan, X., & Heitman, J. (1999). Cyclic AMP-dependent protein kinase regulates pseudohyphal differentiation in *Saccharomyces cerevisiae*. *Mol Cell Biol*, *19*(7), 4874-4887.
- Parrinello, M., & Rahman, A. (1981). Polymorphic Transitions in Single-Crystals - a New Molecular-Dynamics Method. *Journal of Applied Physics*, *52*(12), 7182-7190. doi:Doi 10.1063/1.328693
- Peeters, K., Van Leemputte, F., Fischer, B., Bonini, B. M., Quezada, H., Tsytlonok, M., . . . Thevelein, J. M. (2017). Fructose-1,6-bisphosphate couples glycolytic flux to activation of Ras. *Nat Commun*, *8*(1), 922. doi:10.1038/s41467-017-01019-z
- Ponder, J. W., & Case, D. A. (2003). Force fields for protein simulations. *Adv Protein Chem*, *66*, 27-85.
- Rappsilber, J., Mann, M., & Ishihama, Y. (2007). Protocol for micro-purification, enrichment, pre-fractionation and storage of peptides for proteomics using StageTips. *Nat Protoc*, *2*(8), 1896-1906. doi:10.1038/nprot.2007.261
- Reiter, W., Anrather, D., Dohnal, I., Pichler, P., Veis, J., Grotli, M., . . . Ammerer, G. (2012). Validation of regulated protein phosphorylation events in yeast by quantitative mass spectrometry analysis of purified proteins. *Proteomics*, *12*(19-20), 3030-3043. doi:10.1002/pmic.201200185
- Salomon-Ferrer, R., Case, D. A., & Walker, R. C. (2013). An overview of the Amber biomolecular simulation package. *Wiley Interdisciplinary Reviews-Computational Molecular Science*, *3*(2), 198-210. doi:10.1002/wcms.1121
- Sikorski, R. S., & Hieter, P. (1989). A system of shuttle vectors and yeast host strains designed for efficient manipulation of DNA in *Saccharomyces cerevisiae*. *Genetics*, *122*(1), 19-27.
- Tagwerker, C., Flick, K., Cui, M., Guerrero, C., Dou, Y., Auer, B., . . . Kaiser, P. (2006). A tandem affinity tag for two-step purification under fully denaturing conditions: application in ubiquitin profiling and protein complex identification combined with in vivocross-linking. *Mol Cell Proteomics*, *5*(4), 737-748. doi:10.1074/mcp.M500368-MCP200
- Tanaka, K., Nakafuku, M., Tamanoi, F., Kaziro, Y., Matsumoto, K., & Toh-e, A. (1990). IRA2, a second gene of *Saccharomyces cerevisiae* that encodes a protein with a domain homologous to mammalian ras GTPase-activating protein. *Mol Cell Biol*, *10*(8), 4303-4313.
- Vizcaino, J. A., Csordas, A., del-Toro, N., Dianes, J. A., Griss, J., Lavidas, I., . . . Hermjakob, H. (2016). 2016 update of the PRIDE database and its related tools. *Nucleic Acids Res*, *44*(D1), D447-456. doi:10.1093/nar/gkv1145
- Voordeckers, K., Kimpe, M., Haesendonckx, S., Louwet, W., Versele, M., & Thevelein, J. M. (2011). Yeast 3-phosphoinositide-dependent protein kinase-1 (PDK1) orthologs Pkh1-3 differentially regulate phosphorylation of protein kinase A (PKA) and the protein kinase B (PKB)/S6K ortholog Sch9. *J Biol Chem*, *286*(25), 22017-22027. doi:10.1074/jbc.M110.200071

Zhu, K., Borrelli, K. W., Greenwood, J. R., Day, T., Abel, R., Farid, R. S., & Harder, E. (2014). Docking covalent inhibitors: a parameter free approach to pose prediction and scoring. *J Chem Inf Model*, 54(7), 1932-1940. doi:10.1021/ci500118s
